# Genetic regulation of the human plasma proteome in 54,306 UK Biobank participants

Benjamin B. Sun<sup>1</sup>, Joshua Chiou<sup>2\*</sup>, Matthew Traylor<sup>3\*</sup>, Christian Benner<sup>4\*</sup>, Yi-Hsiang Hsu<sup>5\*</sup>, Tom G. Richardson<sup>3\*</sup>, Praveen Surendran<sup>6\*</sup>, Anubha Mahajan<sup>4\*</sup>, Chloe Robins<sup>7\*</sup>, Steven G. Vasquez-Grinnell<sup>8\*</sup>, Liping Hou<sup>9\*</sup>, Erika M. Kvikstad<sup>8\*</sup>, Oliver S. Burren<sup>10</sup>, Madeleine Cule<sup>11</sup>, Jonathan Davitte<sup>7</sup>, Kyle L. Ferber<sup>12</sup>, Christopher E. Gillies<sup>13</sup>, Åsa K. Hedman<sup>14</sup>, Sile Hu<sup>3</sup>, Tinchu Lin<sup>15</sup>, Rajesh Mikkilineni<sup>16</sup>, Rion K. Pendergrass<sup>4</sup>, Corran Pickering<sup>17</sup>, Bram Prins<sup>10</sup>, Anil Raj<sup>11</sup>, Jamie Robinson<sup>1</sup>, Anurag Sethi<sup>11</sup>, Lucas D. Ward<sup>18</sup>, Samantha Welsh<sup>17</sup>, Carissa M. Willis<sup>18</sup>, Alnylam Human Genetics, AstraZeneca Genomics Initiative, Biogen Biobank Team, Bristol Myers Squibb, Genentech Human Genetics, GlaxoSmithKline Genomic Sciences, Pfizer Integrative Biology, Population Analytics of Janssen Data Sciences, Regeneron Genetics Center, Lucy Burkitt-Gray<sup>17</sup>, Mary Helen Black<sup>9</sup>, Eric B. Fauman<sup>2</sup>, Joanna M. M. Howson<sup>3</sup>, Hyun Min Kang<sup>13</sup>, Mark I. McCarthy<sup>4</sup>, Eugene Melamud<sup>11</sup>, Paul Nioi<sup>18</sup>, Slavé Petrovski<sup>10,19</sup>, Robert A. Scott<sup>6</sup>, Erin N. Smith<sup>20</sup>, Sándor Szalma<sup>20</sup>, Dawn M. Waterworth<sup>21</sup>, Lyndon J. Mitnau<sup>13</sup>, Joseph D. Szustakowski<sup>8#</sup>, Bradford W. Gibson<sup>22#</sup>, Melissa R. Miller<sup>2#</sup>, Christopher D. Whelan<sup>1#</sup>

\*These authors contributed equally. The ordering was randomly determined.

#These authors jointly directed the work.

1. Translational Biology, Research & Development, Biogen Inc., Cambridge, MA, US
2. Internal Medicine Research Unit, Worldwide Research, Development and Medical, Pfizer, Cambridge, MA, US
3. Department of Genetics, Novo Nordisk Research Centre Oxford, Oxford, UK, UK
4. Genentech, South San Francisco, CA, US
5. Amgen Research, Cambridge, MA, US
6. Genomic Sciences, GlaxoSmithKline, Stevenage, UK, UK
7. Genomic Sciences, GlaxoSmithKline, Collegeville, PA, US
8. Bristol Myers Squibb, Princeton, NJ, US
9. Population Analytics, Janssen Research & Development, Spring House, PA, US
10. Centre for Genomics Research, Discovery Sciences, BioPharmaceuticals R&D, AstraZeneca, Cambridge, UK, UK
11. Calico Life Sciences LLC, South San Francisco, CA, US
12. Biostatistics, Research and Development, Biogen Inc., Cambridge, MA, US
13. Regeneron Genetics Center, Tarrytown, NY, US
14. External Science and Innovation Target Sciences, Worldwide Research, Development and Medical, Pfizer, Stockholm, Sweden
15. Analytics and Data Sciences, Biogen Inc., Cambridge, MA, US
16. Takeda Development Center Americas, Inc. /Data Science Institute, Cambridge, MA, US
17. UK Biobank, Stockport, Greater Manchester, UK
18. Alnylam Human Genetics, Discovery & Translational Research, Alnylam Pharmaceuticals, Cambridge, MA, US
19. Department of Medicine, University of Melbourne, Austin Health, Melbourne, Australia
20. Takeda Development Center Americas, Inc., San Diego, CA, US
21. Immunology, Janssen Research & Development, Spring House, PA, US
22. Amgen Research, South San Francisco, CA, US

## 45 **Abstract**

46 The UK Biobank Pharma Proteomics Project (UKB-PPP) is a collaboration between the UK  
47 Biobank (UKB) and thirteen biopharmaceutical companies characterising the plasma  
48 proteomic profiles of 54,306 UKB participants. Here, we describe results from the first phase  
49 of UKB-PPP, including protein quantitative trait loci (pQTL) mapping of 1,463 proteins that  
50 identifies 10,248 primary genetic associations, of which 85% are newly discovered. We also  
51 identify independent secondary associations in 92% of *cis* and 29% of *trans* loci, expanding  
52 the catalogue of genetic instruments for downstream analyses. The study provides an updated  
53 characterisation of the genetic architecture of the plasma proteome, leveraging population-  
54 scale proteomics to provide novel, extensive insights into *trans* pQTLs across multiple  
55 biological domains. We highlight genetic influences on ligand-receptor interactions and  
56 pathway perturbations across a diverse collection of cytokines and complement proteins, and  
57 illustrate long-range epistatic effects of *ABO* blood group and *FUT2* secretor status on proteins  
58 with gastrointestinal tissue-enriched expression. We demonstrate the utility of these data for  
59 drug target discovery by extending the genetic proxied effect of PCSK9 levels on lipid  
60 concentrations, cardio- and cerebro-vascular diseases, and additionally disentangle specific  
61 genes and proteins perturbed at COVID-19 susceptibility loci. This public-private partnership  
62 provides the scientific community with an open-access proteomics resource of unprecedented  
63 breadth and depth to help elucidate biological mechanisms underlying genetic discoveries and  
64 accelerate the development of novel biomarkers and therapeutics.

65

## 66 **Main**

67 Genetic studies of human populations are increasingly used as research tools for drug discovery  
68 and development. These studies can facilitate the identification and validation of therapeutic  
69 targets<sup>1,2</sup>, help predict long-term consequences of pharmacological intervention<sup>3</sup>, improve  
70 patient stratification for clinical trials<sup>4</sup>, and repurpose existing drugs<sup>5</sup>. Several precompetitive  
71 biopharmaceutical consortia have recently invested in population biobanks to accelerate  
72 genetics-guided drug discovery, enhancing massive-scale phenotype-to-genotype studies such  
73 as the UK Biobank (UKB)<sup>6,7</sup> with comprehensive multi-omics profiling of biological samples<sup>8-</sup>  
74 <sup>10</sup>.

75  
76 Ongoing private-public investments in biobank-based genetics are supported, in part, by a  
77 series of systematic analyses of historical drug development pipelines, all indicating that drugs  
78 developed with supporting evidence from human genetics are at least twice as likely to be  
79 approved<sup>11,12</sup>. Recent advances, such as the genetics-guided repurposing of drugs targeting  
80 *IFNAR2* and *ACE2* for early treatment of COVID-19<sup>13</sup> and the identification of protective,  
81 protein-truncating variants implicating *GPR75* as a therapeutic target for obesity<sup>14</sup>, further  
82 highlight the promise of these investments. Nonetheless, human genetics remains an imprecise  
83 instrument for biopharmaceutical research and development, as genome-wide association  
84 studies (GWAS) frequently implicate genetic variants without clear causal genes mediating  
85 their impact(s)<sup>15</sup> or map to genes implicating putative drug targets with poorly understood  
86 biology or unclear mechanisms of modulation<sup>1</sup>.

87  
88 Combining human genetics with high-throughput proteomics could help bridge the gap  
89 between the human genome and human diseases<sup>16</sup>. Circulating proteins can provide insights  
90 into the current state of human health<sup>17</sup> and partially capture the influences of lifestyle and

91 environment on disease pathogenesis<sup>18</sup>. Measuring thousands of proteins at population scale  
92 could improve genetic loss-of-function predictions<sup>19</sup>, help discover novel clinical biomarkers  
93 for improved patient stratification<sup>16</sup>, and improve fine-mapping of causal genes linked to  
94 complex diseases<sup>2,15</sup>.

95

96 To date, most large-scale investigations have characterized genetic influences on blood plasma  
97 protein abundances using high-throughput aptamer<sup>20-24</sup>- or antibody-based<sup>22,25,26</sup> assays. These  
98 studies have identified upwards of 18,000 associations between sequence variants and plasma  
99 protein concentrations (protein quantitative trait loci, pQTLs), using samples typically sourced  
100 from databases with proprietary subject-level access. The open-access framework<sup>27</sup>, deep  
101 phenotypic characterization<sup>6</sup>, and long-term development<sup>8,9,28</sup> of population studies like UKB  
102 offers a unique opportunity to expand proteo-genomics to massive scale, broaden research use  
103 of high-throughput proteomic data, build more extensive pQTL databases, and accelerate the  
104 discovery of biomarkers, diagnostics and medicines. To fulfil these aims, we formed the UK  
105 Biobank Pharma Proteomics Project (UKB-PPP) - a precompetitive consortium of 13  
106 biopharmaceutical companies funding the generation of multiplex proteomic data using blood  
107 plasma samples from UKB. Here, we describe the measurement, processing, and downstream  
108 genetic analysis of 1,472 plasma analytes measured across 54,306 UKB participants using the  
109 antibody-based Proximity Extension Assay<sup>29</sup>.

110

## 111 **Results**

### 112 **Overview of UKB-PPP characteristics**

113 We conducted proteomic profiling on blood plasma samples collected from 54,306 UKB  
114 participants using the Olink Explore 1536 platform, measuring 1,472 protein analytes,  
115 capturing 1,463 unique proteins (**Figure 1a, Supplementary Information, Extended Data**  
116 **Figure 1**). This included a randomised subset of 46,673 UKB participants at baseline visit  
117 (“randomised baseline”), 6,385 individuals at baseline selected by the UKB-PPP consortium  
118 members (“consortium-selected”) and 1,268 individuals who participated in the COVID-19  
119 repeat imaging study at multiple visits (**Figure 1a, Methods**).

120

121 The randomised baseline participants were highly representative of the overall UKB population  
122 for various demographic characteristics (**Supplementary Table 1**). Compared to the overall  
123 UKB participants, the consortium-selected participants were on average older (by 2.5 years,  
124  $p=5.0 \times 10^{-117}$ ), had lower proportion of women (by 3.2%,  $p=4.1 \times 10^{-7}$ ), and higher body mass  
125 index (BMI, by 2.6 kg/m<sup>2</sup>,  $p=1.3 \times 10^{-16}$ ), different smoking prevalence ( $p=2.1 \times 10^{-6}$ ) and  
126 composition of self-reported ethnic background (UKB data field 21000) ( $p=3.8 \times 10^{-296}$ ), with a  
127 higher proportion of non-white ethnicities (12% vs 6%) (**Figure 1b, Supplementary Table 1**).

128 The COVID-19 imaging participants had a younger age distribution (difference in means of  
129 6.3 years,  $p=1.2 \times 10^{-162}$ ), lower body mass index (BMI, by 1.1 kg/m<sup>2</sup>,  $p=1.7 \times 10^{-20}$ ) and smoking  
130 prevalence ( $p=2.1 \times 10^{-9}$ ), but were comparable to the overall UKB participants in sex, ethnic  
131 background, and blood group (**Supplementary Table 1**).

132

133 Compared to the full UKB cohort, UKB-PPP participants were enriched for 122 diseases,  
134 spanning multiple systems, at a Bonferroni-corrected threshold of  $p < 6.7 \times 10^{-5}$  (0.05/746  
135 diseases), with no significant depletion in the diseases tested after multiple comparison

136 adjustment (**Supplementary Table 2, Figure 1c**). This enrichment was largely driven by the  
137 inclusion of consortium selected and COVID-19 imaging participants (**Methods**) as the  
138 enrichments were mostly attenuated when considering only the randomised baseline samples  
139 (**Figure 1c**); four diseases remained modestly enriched (1.08-1.09x) and two became depleted  
140 (0.48-0.49x) in the randomised baseline samples alone (**Supplementary Table 2**).

141

## 142 **Proteomic data processing and quality control**

143 Detailed information on the Olink assay, study-wide protein measurement, processing and  
144 quality control (QC) details are provided in **Supplementary Information** and outlined in  
145 **Extended Data Figure 1** and **Figure 1a**. A total of 1,463 unique proteins were measured across  
146 four protein panels (Cardiometabolic, Inflammation, Neurology and Oncology, **Figure 1a and**  
147 **Extended Data Figure 1**), with 3 proteins (CXCL8, IL6, TNF) captured across all four protein  
148 panels (total=1,472 protein analytes, **Supplementary Table 3**). Globally, we did not observe  
149 batch effects, plate effects or abnormalities in protein coefficients of variation (CVs)  
150 (**Supplementary Information**). Protein CVs, representing intra-individual variability across  
151 duplicate samples, ranged from 2.4% to 25%, with a median of 6.3% (**Supplementary Table**  
152 **3, Supplementary Information**). We observed reasonably strong correlations between  
153 measurements across different panels for each of the 3 proteins measured on all four protein  
154 panels (**Extended Data Figure 2a**), with mean correlations of  $r=0.96$  for CXCL8 (range: 0.95-  
155 0.98),  $r=0.92$  for IL6 (range: 0.88-0.95) and  $r=0.81$  for TNF (range: 0.79-0.84). We also found  
156 strong correlation ( $r=0.85$ ) for Cystatin C independently measured using the immuno-  
157 turbidimetric approach in UKB.

158

## 159 **Biological associations with age, sex and BMI**

160 In total, we found 1,126, 1,180 and 1,322 associations between protein levels and age, sex and  
161 BMI (as covariates in the same model, **Methods**) respectively at a Bonferroni-corrected  
162 threshold of  $p < 3.4 \times 10^{-5}$  (**Extended Data Figure 3a, Supplementary Table 4**). Many of the  
163 observed associations of protein levels with age, sex and BMI are either well-established or  
164 repeatedly reported in prior studies<sup>20,30-34</sup> – such as those between age and levels of GDF15,  
165 CHRDL1, EDA2R; sex and leptin, prostatic acid phosphatase (PSA) and CGA; and BMI and leptin, IGFBP1 and  
166 IGFBP2 (**Extended Data Figure 3a, Supplementary Table 4**). Comparing association results  
167 between overlapping proteins measured using the aptamer-based SomaScan assay in the  
168 INTERVAL study<sup>20</sup>, we found significant correlations in relative effect sizes for age ( $r=0.45$ ,  
169  $p=5.3 \times 10^{-37}$ ), sex ( $r=0.65$ ,  $p=1.8 \times 10^{-86}$ ) and BMI ( $r=0.67$ ,  $p=4.4 \times 10^{-94}$ ) (**Extended Data**  
170 **Figure 3b**).

171  
172 We also explored interaction effects between age, sex and BMI on protein levels in the same  
173 model. In total, we found 34 proteins levels with evidence of significant interactions ( $p < 3.4 \times 10^{-5}$ )  
174 between age, sex and BMI; 1,149 between age and sex; 463 between sex and BMI; and 531  
175 between age and BMI (**Supplementary Table 5**). For example, we found the strongest  
176 interaction between age and sex for glycodelin, also known as progesterone-associated  
177 endometrial protein (PAEP,  $p=2.8 \times 10^{-1445}$ ). Glycodelin is a glycoprotein expressed in  
178 mammary glands and endometrial tissues<sup>35</sup>. Levels of glycodelin decreased with age for  
179 females only, particularly before the age of menopause (~50 years), whilst for males, levels  
180 steadily increased with age (**Figure 1d**). After 55 years of age, levels of glycodelin slowly  
181 increased in females at a similar rate to males. These effects are consistent with the role of  
182 glycodelin in female reproductive tissues and their associated changes in hormone levels (such

183 as progesterone) around menopause<sup>35</sup>, demonstrating that the proteomic assay used in this  
184 cohort can capture physiological effects.

185

## 186 **Discovery of pQTLs**

187 Discovery pQTL analyses were performed in European ancestry participants from the  
188 randomised baseline cohort (n=35,571), which was broadly representative of the full UKB  
189 cohort, with the remaining samples (n=18,181) used as a replication cohort (**Figure 1b-c,**  
190 **Supplementary Tables 1-2, Methods**). We performed pQTL mapping of up to ~22.6 million  
191 imputed autosomal variants for 1,463 proteins post-QC, of which 1,425 proteins are encoded  
192 by genes on autosomes. We identified 10,248 significant primary associations across 2,928  
193 independent genetic regions at a multiple-corrected threshold of  $p < 3.4 \times 10^{-11}$  (**Figure 2a,**  
194 **Supplementary Table 6**). At a less stringent, single-phenotype genome-wide significance  
195 threshold of  $p < 5 \times 10^{-8}$ , we found 9,150 additional associations for a total of 1,421 proteins. We  
196 base the ensuing results on associations that remained significant after adjustment for multiple  
197 testing, unless otherwise indicated. 1,377 of the 1,463 proteins tested (93.7%) had at least one  
198 pQTL at  $p < 3.4 \times 10^{-11}$ , with 82% of proteins tested (1,162 of 1,425 proteins encoded by genes  
199 on autosomes) having a *cis* association (within 1Mb from the gene encoding the protein). We  
200 found a significant negative relationship between the number of pQTLs and the proportion of  
201 samples that were below limits of detection (LOD) for the proteins of interest (Spearman's  $\rho =$   
202  $0.47$ ,  $p = 2.7 \times 10^{-82}$ , **Extended Data Figure 4a**), where 67% of proteins without a pQTL (*c.f.*  
203 3.7% of proteins with pQTL(s)) have more than 50% of samples below LOD (**Extended Data**  
204 **Figure 4b**). We observed, on average, a median of 6 primary associations (5<sup>th</sup>-95<sup>th</sup> quantiles:  
205 1-19) per protein, with 56 proteins (3.8%) having  $\geq 20$  associations (**Figure 2b top**). Genomic  
206 inflation was well-controlled, with median  $\lambda_{GC} = 1.04$  (standard deviation=0.018). The general  
207 inverse trend between effect size magnitudes and MAF remained for both *cis* and *trans*



208 associations, with *trans* associations showing smaller magnitudes of effect sizes than *cis*  
209 associations (**Figure 2c**). Approximately 5.6% (570/10,248) and 1.5% (155/10,248) of the  
210 primary associations had MAF<1% and 0.5% respectively.

211

212 1,163 of the 10,248 primary associations were in *cis* and 9,085 were in *trans* (>1Mb from the  
213 gene encoding the protein). 59%, 95% and 97% of the *cis* associations were within the gene,  
214 50Kb and 100Kb from the gene start site respectively. We found no systematic enrichment of  
215 *trans* pQTLs occurring on the same chromosomes as the protein tested after accounting for  
216 chromosome lengths (Fisher's test  $p=0.89$ ). All but two *trans* pQTLs on the same chromosome  
217 as the gene encoding the protein were >2Mb away from the corresponding gene (93%  
218 were >5Mb, 81% were >10Mb away).

219

220 63% (1,835/2,928) of the independent genetic loci were associated with a single protein, whilst  
221 10% were associated with  $\geq 5$  proteins (pleiotropic region), and 13 loci were extremely  
222 pleiotropic, associated with  $\geq 100$  proteins (**Figure 2a**). These included well-established  
223 pleiotropic loci such as *MHC*, *ABO*, *ZFPM2*, *ARHGEF3*, *GCKR*, *SERPINA1*, *SH2B3* and  
224 *ASGRI*, all of which have previously been identified in large multiplex pQTL studies<sup>20,22-24</sup>.

225

226 From the annotations of the primary pQTLs (**Extended Data Figure 5**), we identified 25 *cis*  
227 pQTLs annotated as potential high-impact variants (e.g., frameshift, stop gained, start lost,  
228 splice acceptor, splice donor, nonsense variants) (**Supplementary Table 7**). Among them, 10  
229 of the primary *cis* pQTLs variants code for start codon lost/stop codon gained, of which 9 have  
230 minor alleles leading to decreased corresponding protein levels (**Supplementary Table 7**). 18  
231 *trans* pQTLs SNPs were also annotated as potential high-impact. The majority of pQTLs  
232 identified in this study were located at non-coding regions. These non-coding pQTLs were

233 enriched in regulatory regions, including SNPs located at promoters, enhancers, transcription  
234 factor binding sites, CTCF binding sites, and open chromatin regions (hypergeometric test  
235  $p=3.1 \times 10^{-6}$ ; **Supplementary Table 8**). Of the *cis* pQTLs, 23% (273) were protein-altering  
236 variants, or in LD ( $r^2 > 0.8$ ) with protein-altering variants (**Supplementary Table 9**). Overall,  
237 at 49% (575) of primary *cis* associations, the index variant was in at least weak LD ( $r^2 > 0.01$ )  
238 with a protein-altering variant.

239

## 240 **Replication of pQTLs**

241 96.6% (9,901/10,248) of all primary associations from the discovery cohort (99.9%  
242 [1,162/1,163] *cis* and 96.2% [8,739/9,085] *trans* associations) were also nominally significant  
243 ( $p < 0.05$ ) and directionally concordant in the replication set of 18,181 participants in UKB-PPP  
244 (**Methods, Supplementary Table 6**). After adjusting for the number of associated unique  
245 genomic regions ( $p < 8.7 \times 10^{-6}$ ), 95.7% (1,113) of *cis* and 60.3% (5,480) of *trans* associations  
246 remained significant and directionally concordant in the replication cohort, inline with previous  
247 large-scale studies<sup>20,22-24</sup>. Effect sizes were well-aligned between discovery and replication sets  
248 ( $r=0.99$ ,  $p < 10^{-300}$ , **Extended Data Figure 6a**). Additionally, we observed good concordance  
249 of genetic associations between the three proteins measured across all four protein panels  
250 (CXCL8, IL6, TNF; **Extended Data Figure 2b**), reflecting their phenotypic correlations  
251 (**Extended Data Figure 2a**). The sentinel primary associations for these proteins were at least  
252 nominally GWAS significant across all other protein panels, suggesting good reproducibility  
253 of the same protein targets.

254

## 255 **Identification of novel pQTLs**

256 We cross referenced pQTLs identified in this study with multiple previously published pQTL  
257 results (**Supplementary Information, Methods**), finding that 85% of the primary associations

258 from the discovery cohort (9,098/10,248) had not been identified by a prior pQTL study  
259 (**Supplementary Table 10**). A larger percentage of *trans* pQTLs were novel (91%;  
260 9,309/10,248) than *cis* pQTLs (48%; 562/1,163).

261

## 262 **SNP-based heritability and variance explained by pQTLs**

263 We estimated SNP-based heritability as a sum of contributions from significant lead pQTLs  
264 (pQTL component) and the remaining SNPs across the genome (excluding the pQTL region),  
265 which assumes a polygenic model (polygenic component) using the approach described in <sup>36</sup>  
266 (**Supplementary Table 11, Methods**). The mean total SNP-based heritability was 0.18 (5-95<sup>th</sup>  
267 quantiles: 0.02-0.44) (**Figure 1d**). On average, the *cis* primary pQTLs accounted for 19% of  
268 the overall heritability whilst the *trans* pQTLs accounted for 12% (**Figure 2d, Extended Data**  
269 **Figure 6b**). We found a significant correlation between the lead pQTL component and the  
270 polygenic component (Spearman's  $\rho=0.52$ ,  $p=4.7\times 10^{-102}$ , **Extended Data Figure 6c**), with  
271 stronger correlations between polygenic component and *trans* pQTL ( $\rho=0.62$ ,  $p=1.6\times 10^{-155}$ )  
272 component compared to *cis* ( $\rho=0.38$ ,  $p=3.5\times 10^{-53}$ ).

273

## 274 **Identification and fine mapping of independent signals**

275 We identified 20,540 conditionally independent signals and performed fine-mapping using  
276 SuSiE (**Supplementary Table 12**). 92% (1,069/1,163) of *cis* regions contained more than one  
277 signal (mean 6.0 signals per *cis* region) (**Extended Data Figure 7**). For 11 proteins, there were  
278 20 or more signals in the *cis* region, including CLUL1, KIR3DL1, and TPSAB1, which had  
279 34, 26, and 23 distinct signals respectively. By comparison, only 29% (2,658/9,133) of *trans*  
280 regions contained more than one signal (mean 1.5 signals per *trans* region). Joint tagging  
281 between two or more causal variants by another non-causal variant can boost the significance  
282 of the non-causal variant in the marginal association<sup>37-39</sup>. We observed evidence for boosting

283 at 3.3% (340) of tested associations, where the sentinel variant from the marginal analysis was  
284 not identified in any of the credible sets from the conditional analysis. Strong primary signals  
285 can mask the effect of independent signals in the same region, attenuating their significance in  
286 the marginal association<sup>40</sup>. We observed evidence for masking at 5.6% (1,142) of independent  
287 signals that were either not significant in the marginal analysis ( $p>0.05$ ) or had opposite  
288 conditional effect directions compared to their marginal effect. Long-range regions such as the  
289 extended MHC locus have largely been ignored in large-scale genetic studies due to  
290 complicated LD structure. We observed 1,011 signals for 435 proteins mapping to the MHC  
291 locus, 139 of which were *cis* signals for 18 proteins. Together, these results underscore the  
292 importance of modelling all variants within an associated region for accurate signal  
293 identification.

294

295 We used fine-mapping to narrow down credible sets of causal variants for each independent  
296 pQTL signal (**Supplementary Table 13**). The 95% credible sets contained an average of 22.7  
297 variants, and for 5,672 signals, we were able to determine the likely-causal variant. Credible  
298 sets for *cis* signals tended to be better resolved than those of *trans* signals (mean 95% credible  
299 set variants *cis*: 9.6; *trans*: 29.4), and were more likely to be fine-mapped to causality (signals  
300 with single variant in 95% credible set *cis*: 43%; *trans*: 20%).

301

## 302 ***Trans* associations highlight biological pathways and protein-protein**

### 303 **interactions**

#### 304 ***Biological enrichment for proteins with multiple trans associations***

305 For *trans* pQTLs associated with multiple independent regions ( $\geq 5$ ) across the genome, we  
306 performed gene-set enrichment analyses by Ingenuity Pathway Analysis (IPA) to identify  
307 enrichment of biological functions relevant to cell-to-cell signalling, cellular development,

308 development and process. We found enriched pathways for 201 proteins, including numerous  
309 enriched pathways in cellular activation, survival and signalling relevant to immune cells  
310 (**Supplementary Table 14**). For example, “activation of lymphocytes via IL8-signaling” was  
311 found to be enriched in *trans* pQTLs of CR2 protein. SNPs mapped to the nearest genes  
312 *TNFSF13B*, *EGFR*, *PAK2*, *HLA-DRB1*, *CR2*, *TNFRSF13B*, *RUNX1*, *ST6GAL1*, *PAX5* and  
313 *FOXO1* were associated with CR2 protein expression; these genes were also enriched in the  
314 IL8-signaling pathway that activates lymphocytes. In addition, we found enrichment in  
315 organismal injury mechanisms such as fibrosis (*trans* pQTLs associated with *NCR1* and  
316 *SMPD1*) as well as in lipid metabolism, such as synthesis of triacylglycerol (*trans* pQTLs  
317 associated with *SMPD1* and *NAAA*).

318

### 319 ***Protein interactions involving genes at trans loci and target protein***

320 *Trans* associations may reflect protein interactions between the protein products of genes at the  
321 *trans* locus and the target protein (**Figure 3a**). Additionally, genes at/near *trans* loci may  
322 operate within the same pathway as the target protein and modulate target protein levels  
323 (**Figure 3a**).

324

325 We used the Human Integrated Protein-Protein Interaction Reference (HIPPIE)<sup>41</sup> to test if *trans*  
326 pQTL loci contained at least one gene that encoded for proteins interacting with the target  
327 protein tested. Overall, we found an interacting partner at *trans* loci for 593 proteins  
328 (**Supplementary Table 15**), including multiple receptor-ligand relationships. We found  
329 different gene products at the same pleiotropic *trans* loci interacting with different proteins  
330 with associations in those regions, which may explain certain pleiotropic effects. For 810 *trans*  
331 associations, we found a single, specific interacting protein candidate (**Supplementary Table**  
332 **15**). We also found 13 cases where the protein tested interacted with a protein in one of its

333 *trans* loci and vice versa, indicating established coupled interactions. For example, in the  
334 ADAMTS13-vWF axis, which plays a key role in thrombosis, we found ADAMTS13 levels  
335 to be associated with a *trans* pQTL (rs112814955) at the gene encoding von Willebrand factor  
336 (*VWF*) – the substrate of the ADAMTS13 enzyme. Reciprocally, we found the *trans* pQTL for  
337 vWF (rs505922) in the *ABO* region to be 141Kb upstream of *ADAMTS13*. Other reciprocating  
338 examples included BAG3-HSPB6, PLAU-PLAUR (UROK-UPAR), TNFB-TNR1A-TNR3,  
339 GAS6-AXL, MUC16-MSLN and ITGP2-ITGAM, which are well-established protein  
340 complexes, receptor-ligand pairings, and membrane complexes. Two less well studied  
341 interactions included TNXB-APP and COL18A1-C1QTNF1, underlining potential coupled  
342 pathways for further investigation.

343

344 Notably, in addition to the HSPB6 *trans* pQTL at the *BAG3* locus (rs2234962; Cys151Arg),  
345 we found *trans* associations for both proBNP (NPPB) and NT-proBNP. BAG3 functions  
346 through BAG3-HSP70-HSPB complexes, which play an important role in heart failure and  
347 cardiomyopathies<sup>42</sup>, including the same *BAG3* signal (rs2234962) in previous GWAS of  
348 cardiomyopathies<sup>43,44</sup>. ProBNP and NT-proBNP are established biomarkers of heart failure and  
349 cardiac damage<sup>45</sup>. The rs2234962 pQTL is an independent secondary *cis* pQTL for BAG3  
350 levels from the primary *cis* pQTL (rs35434411, **Supplementary Table 12**), for which we did  
351 not find significant evidence of association with ProBNP ( $p=0.44$ ) and NT-proBNP ( $p=0.058$ )  
352 levels. Taken together, these results provide additional evidence of the *BAG3* rs2234962  
353 missense variant affecting BAG3-HSPB6 complexing, emphasizing the relevance of BAG3 to  
354 downstream blood biomarkers of heart failure and potentially cardiomyopathies.

355

356 ***Insights into cytokine and complement interactions and pathways***

357 We found multiple instances of receptor-ligand interactions at *trans* loci for circulating  
358 cytokines and TNF superfamily proteins/receptors (**Supplementary Table 16**). In addition to  
359 *trans* pQTLs for IL15 at genes encoding its receptor components (IL15RA and IL15RB), we  
360 also found *trans* pQTLs at both *JAK1* and *JAK3*, which are proximal components of IL15  
361 signalling (**Figure 3b**); notably, the *trans* pQTL at *JAK1* is a rare missense mutation  
362 (rs149968614, MAF=0.2%, Val651Met). Furthermore, we found that the variant rs4985556-  
363 A, which causes a premature stop gain in *IL34*, is associated with decreased levels of IL34 in  
364 *cis* (beta=-1.07,  $p=2.0 \times 10^{-1853}$ ) and decreased CD207 (also known as langerin) - a protein  
365 marker expressed in Langerhans cells - levels in *trans* (beta=-0.08,  $p=7.4 \times 10^{-16}$ ). Whilst IL34  
366 and CD207 do not directly interact, this result is highly consistent with the crucial role of IL34  
367 in development and survival of Langerhans cells<sup>46</sup>.

368

369 In the complement pathway, we found multiple *trans* pQTLs in genes for various constituents  
370 within the same complement pathway as the protein tested (**Figure 3c**). In particular, for  
371 protein MASP1, we found 6 of the 13 *trans* associations to lie in genes encoding other  
372 components of the complement pathway (including lectin pathway genes *MASP2*, *MBL2*,  
373 *FCN3*, *COLEC11*, C1-inhibitor gene *SERPING1*, and *VTN*), all of which, except *VTN*, show  
374 direct interactions with MASP1 (**Figure 3c, Supplementary Table 15**). Notably, the *trans*  
375 pQTL at *FCN3* is a low-frequency frameshift variant (rs532781899, MAF=1.4%) leading to  
376 *FCN3* deficiency<sup>47-50</sup>, and here, to reduced MASP1 levels (beta=-1.17,  $p=1.6 \times 10^{-328}$ ). Similarly,  
377 we found a low frequency missense variant in *MASP2* (rs72550870, Asp120Gly, MAF=3.1%),  
378 previously linked to MASP2 deficiency<sup>51-53</sup>, associated with reduced FCN2 levels in this study  
379 (beta=-0.21,  $p=9.3 \times 10^{-32}$ ). We also found C2 levels to be associated with a *trans* pQTL at  
380 *C1R/C1S* and CD59 levels with a *trans* pQTL in the *CFH-CFHRI-5* locus (**Figure 3c**).

381

382 **Scaling of pQTL associations with increasing sample size and numbers of**  
383 **proteins assayed**

384 Previous studies have performed pQTL mapping across different sample sizes and varying  
385 numbers of proteins. Here, through sub-sampling of participants and proteins, we investigated  
386 how the number of associations scaled with sample size and number of proteins assayed  
387 (**Figure 2e**). We observed an initial increase in detectable *cis* pQTLs at sample sizes below  
388 5,000 before slowly plateauing as the number of *cis* pQTLs trended towards the number of  
389 proteins tested (1,463) – the upper bound. However, *trans* pQTLs continued to increase with  
390 larger sample sizes, without signs of plateauing at ~54,000 participants.

391

392 Overall, the number of associations scaled linearly with the number of proteins measured  
393 (**Figure 2f**) with no obvious signs of plateauing for the current extent of proteome coverage.  
394 We found the mean proportion of variance explained by primary sentinel variants increased  
395 the most at sample sizes less than 5,000 (**Figure 2g**). Mean variance explained by *cis*  
396 associations quickly plateaued beyond samples sizes >5,000 whilst the mean variance  
397 explained by *trans* associations continued to slowly increase and drive most of the increase in  
398 mean variance explained at sample sizes >5000 (**Figure 2g**).

399

400 We also found a shift towards an increasing number of genomic regions harbouring  
401 associations with multiple proteins with larger sample sizes, indicating greater detectability of  
402 pleiotropic loci at increased study sizes (**Extended Data Figure 8a**). Furthermore, we found a  
403 slightly sublinear increase in *trans* associations with genes encoding an interacting protein with  
404 the protein tested as sample size increased (**Extended Data Figure 8b**) – suggesting further  
405 *trans* target interacting loci to be found with larger studies.



406

407 Of the four *trans* pQTLs associated with IL15 levels in the IL15 signalling pathway,  
408 associations at the *IL15RA*, *IL2RB*, *JAK1*, *JAK3* loci would not have been detected ( $p < 3.4 \times 10^{-11}$ )  
409 <sup>11</sup>) at sample sizes below 25,000, 10,000, 20,000 and 15,000, on average, respectively.  
410 Moreover, of the 6 *trans* associations for MASP1 in the complement pathway, associations at  
411 the *MASP2*, *MBL2*, *FCN3*, *COLEC11*, *SERPING1* and *VTN* loci would not have been detected  
412 at sample sizes below 5,000, 1,000, 1,000, 1,000, 5,000, 10,000, on average, respectively.  
413 Hence, larger sample sizes would likely lead to increased discovery of *trans* pQTLs networks  
414 as opposed to isolated *trans* associations.

415

#### 416 **Sensitivity analyses of pQTLs**

417 We also explored, *a priori*, the impact of blood cell composition, BMI, seasonal and fasting  
418 time before blood collection on pQTL effects (**Supplementary Table 17, Extended Data**  
419 **Figure 9**), discussed in more detail in **Supplementary Information**. Overall, the variables  
420 tested in the sensitivity analyses had limited impact on the majority of pQTLs.

421

#### 422 **Co-localization with expression QTLs**

423 Integrating pQTL results from UKB-PPP with expression quantitative trait loci (eQTL)  
424 estimates from the eQTLGen<sup>54</sup> GTEx (v8)<sup>55</sup>, we found that 36% (507/1,425 genes available)  
425 of proteins shared a casual variant with the corresponding gene expression using the  
426 HyPrColoc method<sup>56</sup> (based on a posterior probability (PP)  $\geq 0.7$ ) (**Supplementary Table 18-**  
427 **19**). 11% (111/1,023 genes available) colocalized with an eQTL in whole blood  
428 (**Supplementary Table 18**) and 32% (457/1,425 genes) colocalized with eQTL(s) in at least  
429 one tissue type (**Supplementary Table 19**). Of all targets which provided evidence of  
430 colocalization with eQTLs from the eQTLGen and GTEx consortia, 191 protein targets

431 provided evidence of colocalization with gene expression in only one of the 49 tissues analysed  
432 **(Extended Data Figure 10a).**

433

434 Comparing the directions of effect for lead *cis* pQTL for colocalizing protein-expression  
435 combinations across tissues revealed that these were typically concordant with respect to  
436 circulating proteins and gene expression levels **(Extended Data Figure 10b)**, with 93.7% of  
437 eQTLGen and 83.6% of GTEx protein-expression combinations sharing the same direction of  
438 effect. Pervasive discordant directions of effect for molecular QTLs on gene expression and  
439 protein levels are an established phenomenon throughout the human genome, which has been  
440 postulated to be attributed to factors such as protein degradation and genetic canalization<sup>22,57</sup>.  
441 Other possible explanations for discordant directions of effect include the blood-brain barrier,  
442 which may be relevant for genes such as *PARK7*, whose circulating protein shared the same  
443 direction of effect with its gene expression in 4 tissues (esophagus mucosa, heart atrial  
444 appendage, spleen and whole blood) but the opposite direction of effect in the cerebellum  
445 **(Extended Data Figure 10c).**

446

## 447 **Specific insights into disease, biology and potential drug targets**

### 448 *Proteomic insights into COVID-19 associated loci*

449 The COVID-19 pandemic continues to accelerate research into the mechanisms and pathways  
450 influencing risk of COVID-19 infections and potential target candidates for drug compounds.  
451 Here we integrated pQTL data with the largest GWAS meta-analysis of reported and  
452 hospitalized COVID-19 cases conducted to date (<https://www.covid19hg.org/results/r7/>) using  
453 multi-trait colocalization under the HyPrColoc framework<sup>56</sup>.

454

455 For three of the COVID-19 hospitalization loci, we found high posterior probability of  
456 colocalization (PP>0.9) with pQTLs for proteins enriched for expression in lungs, including  
457 surfactant protein D (SFTPD), lysosome-associated membrane glycoprotein 3 (LAMP3) and  
458 mesothelin (MSLN) (**Supplementary Table 20**). At the *MUC5B* locus, we found evidence of  
459 multi-trait colocalizations with SFTPD, LAMP3 and MSLN *trans* pQTLs, driven by the  
460 *MUC5B* promoter variant, rs35705950 (PP=1, **Figure 4a**). Additionally, the *cis* SFTPD  
461 association colocalized with a COVID-19 hospitalization association at the *SFTPD* locus,  
462 driven by the *SFTPD* missense variant, rs721917 (PP=0.93). SFTPD has previously been  
463 causally implicated by Mendelian randomization studies for chronic obstructive pulmonary  
464 disorder<sup>58</sup> and COVID-19 hospitalization<sup>59</sup> risks. At the *SLC22A31* COVID-19 hospitalization  
465 locus, we also found colocalizations with another *trans* LAMP3 pQTL, driven by the  
466 *SLC22A31* missense variant, rs117169628 (PP=0.998). Apart from the pleiotropic *ABO* locus,  
467 all proteins showing evidence of pQTLs colocalizing with COVID19 hospitalization loci  
468 (PP>0.7; *SFTPD*, *MUC5B*, *ELF5*, *SLC22A31* and *TYK2* loci; **Supplementary Table 20**)  
469 showed a 24-fold enrichment for their corresponding gene expression in the lungs ( $p=1.4 \times 10^{-4}$ ).  
470

471

472 In addition to colocalization at the pleiotropic *ABO* locus, we also found evidence of  
473 colocalization between the gene-dense region containing *TYK2*, ICAM-encoding genes at  
474 chromosome 19, and the interleukin-12 receptor subunit beta-1 (*IL12RB1*) *trans* pQTL  
475 (PP=0.95, rs34536443, *TYK2* P1104A). This pQTL is consistent with *TYK2* partial loss of  
476 function caused by P1104A. No additional colocalizations were identified for the other 23  
477 proteins with associations overlapping this locus, including ICAM-1,3,4 and 5 (**Figure 4b**).

478

## 479 *ABO blood group and FUT2 secretor epistasis effects*

480 We observed pleiotropic associations at the *ABO* blood group and fucosyltransferase 2 (*FUT2*)  
481 loci on chromosomes 9 and 19 respectively. The *FUT2* enzyme facilitates expression of ABH  
482 antigens on red cells of corresponding blood groups in mucal and gastro-intestinal (GI)  
483 secretions. Approximately 20% of white Europeans are homozygous for deletion of the *FUT2*  
484 functional secretor allele (rs601338, Trp154Ter), leading to truncation and inactivation of the  
485 enzyme and non-secretion of the blood group antigens<sup>60</sup>. The *FUT2* deletion has been  
486 associated with cholestatic and gastrointestinal conditions<sup>61-63</sup>. This led us to explore the  
487 biologically informed hypothesis that *FUT2* secretor status modifies the effect of blood group  
488 antigen expression on protein levels, serving as an example of long-range gene-by-gene  
489 interaction.

490

491 We did not observe any evidence of dependencies between *ABO* blood group genotypes and  
492 *FUT2* secretor status ( $\chi^2 p=0.65$ ). At a multiple testing corrected threshold of  $p<3.4\times 10^{-5}$ , 352  
493 proteins were associated with *ABO* blood groups and 165 proteins were associated with  
494 secretor status (**Supplementary Table 21**). We found significant interaction between blood  
495 group and secretor status for 38 proteins. For example, *CDH17*, *CDH1* and *CGREF1* plasma  
496 levels were higher in blood group B participants compared to group A in secretors only, whilst  
497 for *GALNT3*, we saw the opposite effect (**Figure 5a**). We saw that the extent of differences in  
498 protein levels between secretors and non-secretors varied depended on the blood group for  
499 these proteins. We also replicated the only previous reported such interaction effect seen for  
500 alkaline phosphatase (*ALP*) in a Japanese cohort<sup>64</sup>.

501

502 We found significant gene expression enrichments for proteins with significant interaction  
503 effects across multiple human gastrointestinal tissues<sup>65</sup>, including duodenum, small intestine,

504 colon, rectum, and pancreas – consistent with the role of FUT2 in GI secretions (**Figure 5b**  
505 **left**). Enrichment in the intestine was also observed in orthologous genes in a mouse tissue  
506 expression data<sup>66</sup> (**Figure 5b right**), indicating a degree of conservation between these two  
507 species.

508

509 Our results provide evidence of blood group and secretor interaction in the modulation of  
510 proteomic concentrations, which may underline susceptibility to various FUT2/ABO  
511 associated GI conditions.

512

### 513 ***Inflammasome pathway connections***

514 Inflammasomes are multimeric protein complexes that mediate innate immune responses,  
515 primarily through the activation of CASP1 and subsequent cleavage, activation, and non-  
516 canonical secretion of pro-inflammatory cytokines IL-18 and IL-1 $\beta$ <sup>67,68</sup>. Rare, protein altering  
517 variants in inflammasome components are known to cause many inherited autoinflammatory  
518 conditions<sup>69</sup>. The causal relationship between genetic alterations in the inflammasome and  
519 autoinflammation has been clinically validated by their successful treatment with anti-IL-1 $\beta$   
520 therapies<sup>70</sup>.

521

522 In this study, we observed multiple *trans* pQTL associations between inflammasome  
523 components and downstream effector proteins CASP1, IL-18, and IL-1 $\beta$  (**Supplementary**  
524 **Table 22**). These associations included genes that encode inflammasome scaffolding proteins  
525 (*NLRCA4*, *NLRP6*, and *NLRP12*); negative regulators of inflammasome activity (*VDR*,  
526 *CARD18*); and *GSDMD*, which enables the non-canonical secretion of IL-18 and IL-1 $\beta$ , and is  
527 an activator of pyroptosis (**Supplementary Table 22**). Associations at the *NLRP12*  
528 inflammasome locus are discussed in **Supplementary Information**.

529

530 Taken together, these results indicate that - in addition to known, rare, highly penetrant,  
531 disease-causing variants – common forms of genetic variability play a more subtle, but  
532 significant, role in inflammasome-mediated innate immune responses.

533

### 534 ***PCSK9 pQTLs reflect pharmacological effects on cholesterol and indicated diseases***

535 The causal effects of PCSK9 levels on LDL and total cholesterol have been well established  
536 through various orthogonal means, with several randomized clinical trials demonstrating the  
537 efficacy of PCSK9 inhibitors on cholesterol levels and cardiovascular events<sup>71-74</sup>. Leveraging  
538 multiple *cis* pQTLs as genetic instruments to proxy directly for the effect of PCSK9 levels, we  
539 employed Mendelian randomization to examine causal effects of PCSK9 levels on lipids (HDL,  
540 LDL and total cholesterol), cardiovascular outcomes (coronary heart disease (CHD),  
541 myocardial infarction (MI)) and ischaemic stroke (IS: large-artery (IS-LA) and small-vessel  
542 (IS-SV) subtypes) (**Methods**).

543

544 For lipids, we found significant causal effects of increased PCSK9 on increased LDL  
545 cholesterol ( $MR_{LDL}=0.45$ ,  $p=6.5 \times 10^{-41}$ ) and total cholesterol ( $MR_{TC}=0.31$ ,  $p=4.0 \times 10^{-24}$ ), and  
546 decreased HDL cholesterol ( $MR_{HDL}=-0.04$ ,  $p=0.011$ ) (**Extended Data Figure 11**). We also  
547 found significant causal associations with increased risk of CHD ( $MR_{\log(CHD\ OR)}=0.24$ ,  
548  $p=2.2 \times 10^{-10}$ ) and MI ( $MR_{\log(MI\ OR)}=0.27$ ,  $p=9.3 \times 10^{-10}$ ). For stroke, we found significant causal  
549 associations with increased risk of large artery ischaemic stroke subtype ( $MR_{\log(IS-LA\ OR)}=0.27$ ,  
550  $p=0.011$ ). Whilst genetic *PCSK9* effects on LDL, total cholesterol and CHD have been found  
551 previously<sup>36,75</sup>, effects of PCSK9 on HDL cholesterol and large artery ischaemic stroke have  
552 not been substantiated by previous MR studies, likely due to decreased power. These findings

553 extends the corroborated effects observed across multiple randomised clinical trials of PCSK9  
554 inhibitors<sup>72</sup>.  
555

## 556 **Discussion**

557 High-throughput proteomic profiling of population biobanks holds the potential to accelerate  
558 our understanding of human biology and disease. Here, we present findings from one of the  
559 largest proteogenomic studies conducted to date, combining blood plasma measurements of  
560 1,463 proteins with imputed genome-wide genotyping of 54,306 individuals in the UK Biobank.  
561 The study constructs an updated genetic atlas of the plasma proteome, identifying 10,248  
562 primary associations with 1,377 protein levels, and provides the scientific community with an  
563 open-access, population-scale proteomics resource with individual level data and deep  
564 phenotypic integration, facilitating downstream experimentation.

565

566 We demonstrate the utility of these data for basic biological discovery using distinct examples  
567 – capturing multiple biological signalling networks, protein interactions, and long-range  
568 epistatic effects. We also underline potential use cases for drug discovery and development by  
569 validating the well-established causal relationship between PCSK9, lipid levels, cardiovascular  
570 disease and stroke, and highlight potential targets and mechanisms for COVID-19 risk. Our  
571 results expand the catalogue of genetic instruments for downstream MR and associated  
572 genomic loci for multi-trait colocalization. The availability of individual-level data should  
573 accelerate both applied and methodological studies that would not be possible with summary  
574 data. The inclusion of consortium selected samples, enriched for a range of diseases across  
575 multiple systems, also increases power for prospective proteome-disease association studies,  
576 facilitating biomarker discovery for rare conditions such as spinal muscular atrophy, where  
577 case counts are boosted by approximately five-fold compared to random sampling.

578

579 The size and breadth of this study enabled us to estimate how the genetic architecture of pQTLs  
580 scales with increasing sample size and proteome coverage, potentially guiding decisions for



581 future proteogenomic investments. We found that the discovery of *cis* pQTLs is saturated to  
582 the number of proteins tested after ~10,000 samples. Although *trans* association discoveries  
583 continue to increase, the heritabilities explained by *trans* loci increase at a slower rate beyond  
584 10,000 samples. Therefore, we anticipate most gains from future, larger-scale studies to be  
585 driven by the detection of *trans* associations, rare associations and associations with proteins  
586 not previously tested. The next phase of UKB-PPP will increase the total number of plasma  
587 measurements to 2,926 unique proteins, employing the Olink Explore 3072 assay to the same  
588 individuals described in this study. We will also include 4,500 plasma samples collected  
589 approximately 10 years after initial blood draws from this randomised cohort, facilitating  
590 expanded longitudinal analyses.

591

592 Given the predominantly white European ancestral composition of UKB, the project was  
593 largely unable to capture the full genetic and phenotypic diversity of the human population.  
594 Thus, the present study and its expansion project will likely miss important insights in non-  
595 European individuals. We encourage prospective users of these data to integrate additional  
596 proteogenomic data from under-represented populations<sup>76</sup>, and strongly recommend that future  
597 investments in population proteomics prioritize genetic diversity in their cohort selection(s)<sup>77</sup>.

598

599 The study highlights the strengths of the antibody based Olink® Explore Assay for pQTL  
600 detection and downstream biological discovery. However, the Explore 1536 assay captures less  
601 than 10% of the canonical human proteome, and affinity-based platforms largely overlook  
602 protein isoforms and proteoforms generated by post-translational modifications. To address  
603 these issues, the consortium has initiated a systematic evaluation of affinity- and mass  
604 spectrometry-based assays, assessing the relative sensitivity, specificity, and scalability of the  
605 platforms, alongside the proportion of validated human proteins and proteoforms captured by

606 each. Orthogonal validation of antibody-based proteomics using aptamer- and mass  
607 spectrometry-based assays is strongly recommended before population-scale proteomics  
608 studies expand to sample sizes of 100,000 and beyond.

609

610 Following on from the successful exome sequencing and the ongoing whole genome  
611 sequencing of UK Biobank, the Pharma Proteomics Project builds on the precompetitive  
612 industry collaboration framework in generating high-dimensional, population-scale data for the  
613 advancement of science and medicine. The wider research community will be able to leverage  
614 this open-access resource to test hypotheses crucial to the development of improved diagnostics  
615 and therapeutics for human disease.

616

## 617 **Methods**

### 618 **UK Biobank participants**

619 UK Biobank (UKB) is a population-based cohort of approximately 500,000 participants aged  
620 40-69 years recruited between 2006 and 2010. Participant data include genome-wide  
621 genotyping, exome sequencing, whole-body magnetic resonance imaging, electronic health  
622 record linkage, blood and urine biomarkers, physical and anthropometric measurements.  
623 Further details are available at <https://biobank.ndph.ox.ac.uk/showcase/>. All participants  
624 provided informed consent. This research has been conducted using the UK Biobank Resource  
625 under approved application numbers 65851, 20361, 26041, 44257, 53639, 69804.

626

### 627 **UKB-PPP sample selection and processing**

628 Details of UKB participant selection and sample handling are detailed in **Supplementary**  
629 **Information**.

630

### 631 **Proteomic measurement, processing and quality control**

632 Details of the Olink proteomics assay, data processing and quality control are detailed in  
633 **Supplementary Information**.

634

### 635 **Genomic data processing**

636 UKB genotyping and imputation (and quality control) were performed as described previously<sup>6</sup>.  
637 In addition to checking for sex mismatch, sex chromosome aneuploidy, and heterozygosity  
638 checks, imputed genetic variants were filtered for INFO>0.7, MAC>50 and chromosome  
639 positions were lifted to hg38 build using LiftOver<sup>78</sup>. European ancestry was defined using the  
640 Pan-UKBB definitions in UKB return dataset 2442, “pop = EUR”.

641

## 642 **Genetic association analyses**

643 GWAS were performed using REGENIE v2.2.1 via a two-step procedure to account for  
644 population structure detailed in <sup>79</sup>. In brief, the first step fits a whole genome regression model  
645 for individual trait predictions based on genetic data using the leave one chromosome out  
646 (LOCO) scheme. We used a set of high-quality genotyped variants: minor allele frequency  
647 (MAF)>1%, minor allele count (MAC)>100, genotyping rate >99%, Hardy-Weinberg  
648 equilibrium (HWE) test  $p > 10^{-15}$ , <10% missingness and linkage-disequilibrium (LD) pruning  
649 (1000 variant windows, 100 sliding windows and  $r^2 < 0.8$ ). The LOCO phenotypic predictions  
650 were used as offsets in step 2 which performs variant association analyses using standard linear  
651 regression. We limited analyses to variants with INFO>0.7 and MAC>50 to minimise spurious  
652 associations.

653

654 In the discovery cohort (n=35,571), we included participants of European ancestry from  
655 batches 1-6, and excluded the pilot batch, plates which were normalised separately, and batch  
656 7 (COVID-19 imaging longitudinal samples and baseline samples showing increased  
657 variability and mixed with COVID-19 imaging samples). Participants not included in the  
658 discovery cohort were included in the replication cohort, which consisted of 14,706 White,  
659 1,225 Black/Black British, 998 Asian/Asian British, 148 Chinese, 339 Mixed, 613 Other and  
660 152 missing ethnic backgrounds based on the self-reported ethnicities in UKB (data field  
661 21000).

662

663 For the discovery cohort, association models included the following covariates: age, age<sup>2</sup>, sex,  
664 age\*sex, age<sup>2</sup>\*sex, batch, UKB centre, UKB genetic array, time between blood sampling and  
665 measurement and the first 20 genetic principal components (PCs). The covariates in the

666 replication cohort additionally included whether the participant was pre-selected, either by the  
667 UKB-PPP consortium members or as part of the COVID imaging study.

668

669 To ensure reproducibility of the analysis protocol, the same proteomic QC and analysis  
670 protocols were independently validated across two additional sites using the same initial input  
671 data on the three proteins measured across all protein panels (CXCL8, IL6, TNF).

672

### 673 **Definition and refinement of significant loci**

674 We used a conservative multiple comparison-corrected threshold of  $p < 3.4 \times 10^{-11}$  ( $5 \times 10^{-8}$   
675 adjusted for 1,463 unique proteins) to define significance. We defined primary associations  
676 through clumping  $\pm 1$ Mb around the significant variants using PLINK<sup>80</sup>, excluding the HLA  
677 region (chr6:25.5-34.0Mb) which is treated as one locus due to complex and extensive LD  
678 patterns. Overlapping regions were merged into one, deeming the variant with the lowest  $p$ -  
679 value as the sentinel primary associated variant. To determine regions associated with multiple  
680 proteins, we iteratively, starting from the most significant association, grouped together regions  
681 associated with proteins containing the primary associations that overlapped with the  
682 significant marginal associations for all proteins ( $p < 3.4 \times 10^{-11}$ ). In cases where the primary  
683 associations contained marginal associations that overlapped across multiple groups, we  
684 grouped together these regions iteratively until convergence.

685

### 686 **Variant annotation**

687 Annotation was performed by Ensembl Variant Effect Predictor (VEP), ANNOVAR  
688 (<https://annovar.openbioinformatics.org/en/latest/>) and WGS Annotator (WGSA,  
689 <https://sites.google.com/site/jpopgen/wgsa>). The gene/protein consequence was based on  
690 RefSeq and Ensembl. We reported exon and intron numbers that a variant falls in as in the

691 canonical transcripts. For synonymous mutations, we estimated rank of genic intolerance and  
692 consequent susceptibility to disease based on the ratio of loss-of-function. For coding variants,  
693 SIFT and PolyPhen scores for changes to protein sequence were estimated. For non-coding  
694 variants, transcription factor binding site, promoters, enhancers and open chromatin regions  
695 were mapped to histone marks chip-seq, ATAC-seq and DNase-seq data from The  
696 Encyclopedia of DNA Elements Project (ENCODE, <https://www.encodeproject.org>) and  
697 ROADMAP Epigenomics Mapping Consortium (<http://www.roadmapepigenomics.org>). For  
698 intergenic variants, we mapped the 5' and 3' nearby protein coding genes and provided distance  
699 (from 5' transcription starting site of a protein coding gene) to the variant. Combined  
700 Annotation Dependent Depletion score (CADD, <https://cadd.gs.washington.edu>) was  
701 estimated for non-coding variants. An enrichment analysis hypergeometric test was performed  
702 to estimate enrichment of the associated pQTL variants in specific consequence or regulatory  
703 genomic regions.

704

### 705 **Cross referencing with previously identified pQTLs**

706 To evaluate whether the pQTLs in the discovery set were novel, we used a list of published  
707 pQTL studies (<http://www.metabolomix.com/a-table-of-all-published-gwas-with-proteomics/>)  
708 and the GWAS catalog to identify previously published pQTL studies. Twenty-six studies were  
709 included (**Supplementary Information**). Using a  $p$ -value threshold of  $3.4 \times 10^{-11}$ , we identified  
710 the sentinel variants and associated protein(s) in the previously published studies and queried  
711 those against our discovery pQTLs. If a previously associated sentinel variant-protein pair fell  
712 within a 1Mb window of the discovery set pQTL sentinel variant for the same protein and had  
713 an  $r^2 \geq 0.8$  with any significant SNPs in the region, it was considered a replication.

714

## 715 **Heritability analysis**

716 We estimated the SNP-based heritability as a sum of variance explained (VE) from the primary  
717 sentinel variants for each protein at each loci (pQTL component) and the polygenic component  
718 using the genome-wide SNPs excluding the pQTL regions of each protein. The polygenic  
719 component, which mostly likely satisfies the polygenic model of small genetic contributions  
720 across the genome, was estimated using LD-score regression<sup>81</sup>.

721

## 722 **Identification and fine mapping of independent signals**

723 We used the Sum of Single Effects model (SuSiE, version 0.12.6)<sup>39</sup> to identify and fine map  
724 independent signals from subject level data. To create test regions that accounted for potential  
725 long-range LD, we performed a two-step clumping procedure using PLINK with parameters 1)  
726 “--clump-r2 0.1 --clump-kb 10000 --clump-p1 3.4e-11 --clump-p2 0.05” on the summary  
727 statistics and 2) “--clump-kb 500” on the results of the first clumping step. For each clump, we  
728 extended the coordinates of the left- and right-most variants to a minimum size of 1 Mb. We  
729 merged overlapping clumps and defined these as the test regions. For each test region, we  
730 applied SuSiE after pruning pairs of related samples (1<sup>st</sup> or 2<sup>nd</sup> degree relations) and regressing  
731 out the same covariates as the main analysis with parameters “min\_abs\_corr=0.1, L=10,  
732 max\_iter=100000, refine=TRUE”. For test regions where SuSiE found the maximum number  
733 of independent signals, which was initially set at “L=10”, we incremented “L” by 1 until no  
734 additional signals were detected (up to a maximum of L=35 for the *cis*-region of CLUL1).

735

## 736 **Pathway enrichment and protein interactions**

737 For pleiotropic pQTL loci and multiple associated *trans* pQTL proteins, gene-set enrichment  
738 analyses were performed by Ingenuity Pathway Analysis (IPA) to identify enrichment of  
739 biological functions relevant to cell-to-cell signaling, cellular development, development and

740 process. Gene pathways and networks annotated based on STRING-db and KEGG pathway  
741 databases were also used for enrichment analyses. Hypergeometric tests were performed to  
742 estimate statistical significance and hierarchical clustering trees and networks summarizing  
743 overlapping terms/pathways were generated. To correct for multiple testing, the false discovery  
744 rate (FDR) was estimated.  $FDR < 0.01$  was considered as statistical significance.

745

746 To test if *trans* pQTL loci contained at least one gene (within 1Mb of the *trans* pQTL) that  
747 encoded for proteins interacting with the tested protein, we used the curated protein interaction  
748 database: Human Integrated Protein-Protein Interaction Reference (HIPPIE)<sup>41</sup> release v2.3  
749 (<http://cbdm-01.zdv.uni-mainz.de/~mschaefer/hippie/download.php>).

750

### 751 **Sub-sampling analysis**

752 To estimate how the number of associations scaled with sample size, we took random samples  
753 without replacement of [1,000, 5,000, 10,000, 15,000, 20,000, 25,000 and 30,000] from the  
754 discovery randomized baseline cohort, then performed the association analyses of the primary  
755 sentinel variant and examined the proteomic variance explained in the exact same manner as  
756 the main analyses described above. We also examined how associations scaled with the number  
757 of proteins measured by random sub-sampling [10, 50, 100, 200, 400, 800, 1200] proteins from  
758 the results. We also performed multiple samples (n=3) to check consistency and stability of  
759 sub-sampling results across runs.

760

### 761 **Sensitivity analyses**

762 The variables for sensitivity analyses were chosen *a priori* to avoid post-hoc biases.

### 763 ***Effects of blood cell counts***



764 We investigated the effect of blood-cell (BC) composition on the genetic association with  
765 plasma proteins through sensitivity analyses of pQTLs from the discovery analyses. The top  
766 hits from the discovery analyses were re-analysed adjusting for the following blood-cell  
767 covariates: monocyte count; basophil count; lymphocyte count; neutrophil count; eosinophil  
768 count; leukocyte count; platelet count; hematocrit percentage; hemoglobin concentration.  
769 These blood-cell covariates were selected to represent blood-cell composition due to their  
770 common clinical use. Prior to the analyses, we followed the methods in <sup>82</sup> to exclude blood-  
771 cell measures from individuals with extreme values or relevant medical conditions. Relevant  
772 medical conditions for exclusion included pregnancy at the time the complete blood count was  
773 performed, congenital or hereditary anemia, HIV, end-stage kidney disease, cirrhosis, blood  
774 cancer, bone marrow transplant, and splenectomy. Extreme measures were defined as  
775 leukocyte count  $>200 \times 10^9/L$  or  $>100 \times 10^9/L$  with 5% immature reticulocytes, hemoglobin  
776 concentration  $>20$  g/dL, hematocrit  $>60\%$ , and platelet count  $>1000 \times 10^9/L$ . After blood-cell  
777 measure exclusions, all individuals in the discovery cohort without blood-cell measures had  
778 each measure imputed to the mean of the cohort. Following these exclusions and QC, genetic  
779 analyses of the sentinel variant – protein associations adjusted for blood-cell covariates were  
780 performed using the same approach as the main analysis.

781

782 We further tested whether blood cell composition is partially or fully mediating variant-protein  
783 associations (Genotype  $\rightarrow$  BC measure  $\rightarrow$  Protein) for genetic associations significant within  
784 the discovery ( $p < 3.4 \times 10^{-11}$ ) and not in the sensitivity analyses ( $p > 3.4 \times 10^{-11}$ ). For each variant  
785 – protein association, we first identified the BC phenotypes that were associated with protein  
786 levels at  $p < 3.4 \times 10^{-11}$  within a multivariate linear regression model including blood cell  
787 phenotypes as the predictors, protein as the outcome and adjusted for all other covariates  
788 included in the discovery analysis. We then confirmed if there was an association between the

789 genetic variant (dosage) and each of the blood cell phenotypes (Genotype -> BC) and between  
790 blood cell phenotype and the protein (BC -> Protein) prior to testing for mediation. In the final  
791 test, we compared the strength of associations, Genotype -> Protein, to that of the Genotype ->  
792 Protein in a multivariate model (Protein ~ Dosage + BC phenotype + Discovery Covariates) to  
793 establish whether the variant – protein association is either fully ( $p > 0.01$ ) or partially  
794 ( $p < 3.4 \times 10^{-11}$ ) mediated by the blood cell phenotype.

795

### 796 *Effects of BMI*

797 We investigated the effect of BMI on the genetic association with plasma proteins through  
798 sensitivity analyses of pQTLs from the discovery analyses. The primary associations from the  
799 discovery analyses were re-analysed using the same approach as the main analysis including  
800 BMI [data field: 21001] as an additional covariate.

801

### 802 *Effects of season and amount of time fasted at blood collection*

803 To assess the effects of season and amount of time fasted at blood collection on variant  
804 associations with protein levels, we re-analysed all sentinel pQTLs identified in the main  
805 discovery analyses including season and fasting time as two additional covariates. Blood  
806 collection season (summer/autumn: June to November vs. winter/spring: December to May)  
807 was defined based on the blood collection date and time (data-field: 3166). Participant-reported  
808 fasting time was derived from data-field 74 and was standardized (Z-score transformation)  
809 prior to analysis.

810

### 811 **Co-localization analyses**

812 We investigated evidence of shared genetic variation between the 1,425 circulating proteins  
813 encoded by autosomal genes and their tissue-specific gene expression using the HyPrColoc

814 approach<sup>56</sup>. Analyses were conducted using variant-level priors; alignment probabilities and a  
815 posterior probability of colocalization (PP)  $\geq 0.7$  threshold was applied to indicate evidence of  
816 shared genetic variation. For each circulating protein in turn, we aggregated *cis* pQTL estimates  
817 around their encoding gene region ( $\pm 500$ kbs) from the discovery UKB-PPP GWAS as well  
818 as *cis*-expression quantitative trait loci (eQTL) using whole blood derived findings from the  
819 eQTLGen consortium<sup>54</sup> and 48 other tissue types from the GTEx consortium<sup>55</sup> (v8). This  
820 included all available tissues with eQTLs in GTEx, excluding whole blood, as these data were  
821 included in the eQTLGen meta-analysis.

822

823 Next, for circulating proteins which provided evidence of colocalization in this previous  
824 analysis, we assessed whether lead *cis* pQTL influenced protein levels and gene expression in  
825 the same direction (for gene expression in tissues which provided evidence of colocalization).  
826 Lead *cis* pQTL were selected as those with the smallest *p*-value that also existed in the  
827 corresponding eQTL dataset which were not palindromic variants.

828

829 For colocalization with COVID-19 loci, the top loci reported by the COVID-19 Host Genetics  
830 consortium (<https://app.covid19hg.org/variants>) were updated with estimates from the R7  
831 summary results (<https://www.covid19hg.org/results/r7/>) for hospitalised COVID-19 cases  
832 and reported COVID-19 infections compared to population controls.

833

## 834 **PCSK9 Mendelian randomization**

### 835 ***Instrument selection and outcomes***

836 Instruments to proxy for altered PCSK9 abundance were generated using variants associated  
837 in *cis* (within 1Mb of the PCSK9 gene-coding region) at genome-wide significance ( $p < 5 \times 10^{-8}$ )  
838 to minimise pleiotropic effects. We performed LD clumping to ensure SNPs were independent

839 ( $r^2 < 0.01$ ) by using an in-sample reference panel of 10,000 UK Biobank participants. We  
840 removed SNPs with a F-statistic less than 10 to avoid weak instrument bias.

841

842 Outcomes of interest were measurements of cholesterol, including low-density lipoprotein  
843 cholesterol (LDL-c), high-density lipoprotein cholesterol (HDL-c), triglycerides (TG) and total  
844 cholesterol (TC); coronary heart disease (CHD) and myocardial infarction (MI); ischemic  
845 stroke large artery atherosclerosis and small-vessel subtypes. Data for these outcomes were  
846 extracted from the OpenGWAS project<sup>83,84</sup>. *PCSK9* pQTL effects were harmonised to be on  
847 the same effect allele. If the variant was not present in the outcome dataset, we searched for a  
848 proxy SNP ( $r^2 > 0.8$ ) as a replacement if available.

849

#### 850 ***MR analysis***

851 We performed two-sample MR on the harmonised effects to estimate the effect of genetically  
852 proxied PCSK9 abundance on genetic liability to the outcomes of interest. We estimated the  
853 effects for each individual variant using the two-term Taylor series expansion of the Wald ratio  
854 (WR) and the weighted delta inverse variance weighted (IVW) to meta-analyse the individual  
855 SNP effects to estimate the combined effect of the WRs. Results from the MR analyses were  
856 interrogated using standard sensitivity analyses. We used Steiger filtering to provide evidence  
857 of whether the estimated effect was correctly orientated from PCSK9 abundance to the  
858 outcome and not due to reverse causation.

859

#### 860 **ABO blood group and FUT2 secretor status analysis**

861 ABO blood group was imputed through the genetic data using three SNPs in the *ABO* gene  
862 (rs505922, rs8176719, and rs8176746) following the blood-type imputation method in UKB  
863 (<https://biobank.ndph.ox.ac.uk/ukb/field.cgi?id=23165>), developed from<sup>85-88</sup>. FUT2 secretor

864 status was determined by the inactivating mutation (rs601338), with genotypes GG or GA as  
865 secretors and AA as non-secretors. Interaction term between blood group (O as reference group)  
866 and secretor status was tested adjusting for the same covariates as in the main pQTL analyses  
867 for each protein separately. A multiple testing threshold of  $p < 3.4 \times 10^{-5}$  (0.05/1,463 proteins)  
868 for the interaction terms was used to define statistically significant interaction effects.

869

## 870 **Enrichment for gene expression in tissues**

871 Tissue enrichment of associated proteins was tested using the TissueEnrich R package  
872 (v1.6.0)<sup>89</sup>, using the genes encoding proteins on the Olink panel as background. For enrichment  
873 in human genes, we used the RNA dataset from Human Protein Atlas<sup>65</sup> using all genes that are  
874 found to be expressed within each tissue, whilst for orthologous mouse genes we used data  
875 from Shen *et al.*<sup>66</sup>. The enrichment  $p$ -value thresholds were corrected for multiple comparisons  
876 based on the number of tissues tested (n=35 in human and n=17 in mouse tissues).

877

## 878 **Acknowledgements**

879 We thank the participants, contributors, and researchers of UK Biobank for making data  
880 available for this study – with special thanks to Lauren Carson, John Busby, Naomi Allen and  
881 Rory Collins for making the study possible. We are grateful to the research & development  
882 leadership teams at the thirteen participating UKB-PPP member companies (Alnylam  
883 Pharmaceuticals, Amgen, AstraZeneca, Biogen, Bristol-Myers Squibb, Calico, Genentech,  
884 Glaxo Smith Klein, Janssen Pharmaceuticals, Novo Nordisk, Pfizer, Regeneron, and Takeda)  
885 for funding the study. We thank the Legal and Business Development teams at each company  
886 for overseeing the contracting of this complex, precompetitive collaboration – with particular  
887 thanks to Erica Olson of Amgen, Andrew Walsh of GSK, and Fiona Middleton of AstraZeneca.  
888 The Biogen team is especially thankful to Helen McLaughlin for her project management  
889 support. Finally, we thank the team at Olink Proteomics (Philippa Pettingell, Klev Diamanti,  
890 Cindy Lawley, Linda Jung, Sara Ghalib, Ida Grundberg and Jon Heimer) for their consistent  
891 logistic support throughout the project – with special thanks to Evan Mills for co-championing  
892 the project and leading internal activities at Olink.

893

## 894 **Data availability**

895 Full summary association data are available at [URL available on publication]. Underlying  
896 proteomics data is available under return dataset [return dataset ID and URL on publication  
897 depending on time of official publication] of UK Biobank.

898

## 899 **Code availability**

900 Codes used are part of standard software and tools.

901

## 902 **Author contributions**

903 Study conceptualization & project coordination: C.D.W.; study design and methodology  
904 B.B.S., C.D.W., C.B., J.C., L.H., Y.H.H., E.M.K., A.M., T.G.R., C.R., P.S., M.T., O.S.B., J.D.,  
905 K.L.F., C.E.G., Å.K.H., S.H., T.L., R.M., R.K.P., B.P., J.R., N.T., S.V.G., L.W., C.M.W.,  
906 M.H.B., H.M.K., E.N.S., J.D.S., B.W.G., M.R.M.; proteomic data QC: B.B.S., K.L.F., T.L.;  
907 phenotype harmonisation: B.B.S., T.L., K.L.F., L.B., S.W., C.P.; analysis: B.B.S., C.D.W.,

908 C.B., J.C., L.H., Y.H.H., E.M.K., A.M., T.G.R., C.R., P.S., M.T., O.S.B., J.D., K.L.F., C.E.G.,  
909 Å.K.H., S.H., T.L., R.M., R.K.P., B.P., J.R., N.T., S.G.V., L.W., C.M.W., M.H.B., H.M.K.,  
910 E.N.S., J.D.S., B.W.G., M.R.M., E.B.F.; genetic association analyses: B.B.S.; independent  
911 replication of genetic analyses: A.M., C.B., E.M.K.; Mendelian randomization: J.R.;  
912 conditional analyses: J.C.; epitope mapping analysis: A.M., C.B.; co-localization with eQTLs:  
913 T.G.R, M.T.; sensitivity analysis: A.M., C.B., C.R., P.S., L.H.; variant annotation: Y.H.H.;  
914 writing first draft of manuscript: B.B.S., C.D.W.; writing second draft of manuscript: B.B.S.,  
915 A.M., M.H.B., S.V.G, Y.J., A.K.H., S.P., B.G., S.S., J.D.S., C.R., P.S., E.B.F., L.W., C.W.,  
916 E.M.K., J.M.M.H., H.M.K., C.G., E.N.S., L.B.G., S.W., M.R.M., C.D.W.; all authors critically  
917 reviewed the manuscript.  
918

## 919 **Inclusion and ethics statement**

920 The inclusion and ethics standards have been reviewed where applicable.

## 921 **Competing interests**

922 The authors declare the following competing interests: L.D.W, P.N., C.M.W. are employees  
923 and/or stockholders of Alnylam; Y.H.H., B.W.G. are employees and/or stockholders of Amgen;  
924 S.P., O.S.B., B.P. are employees and/or stockholders of AstraZeneca; B.B.S., C.D.W., T.L.,  
925 K.L.F. are employees and/or stockholders of Biogen; E.M.K., J.D.K., S.V.G. are employees  
926 and/or stockholders of Bristol Myers Squibb; M.C. A.R., A.S., E.M. are employees and/or  
927 stockholders of Calico; R.K.P, M.I.M, A.M., C.B. are employees and/or stockholders of  
928 Genentech; C.R., P.S., R.A.S., J.D. are employees and/or stockholders of GlaxoSmithKline;  
929 M.H.B., L.H. D.M.. are employees and/or stockholders of Janssen Research & Development;  
930 T.G.R., J.M.H., S.H., M.T. are employees and/or stockholders of Novo Nordisk; Å.K.H., E.B.F,  
931 J.C., M.R.M. are employees and/or stockholders of Pfizer; H.M.K., L.J.M., C.E.G. are  
932 employees and/or stockholders of Regeneron; E.N.S, S.S., R.M. are employees and/or  
933 stockholders of Takeda.

934

## 935 **Correspondence**

936 Correspondence and requests for materials should be addressed to Benjamin B. Sun and  
937 Christopher D. Whelan.

938 **Figures**

939 **Figure 1. Overview of UKB-PPP.** (a) Sample set-up and protein measurements. (b) Age distribution  
 940 between different sub-cohorts. (c) Q-Q plot of enrichment *p*-values of UKB compared against all UKB-  
 941 PPP samples and UKB-PPP randomised baseline samples. (d) Violin-plot of glycodeilin (PAEP) levels  
 942 by age bins and sex.  
 943

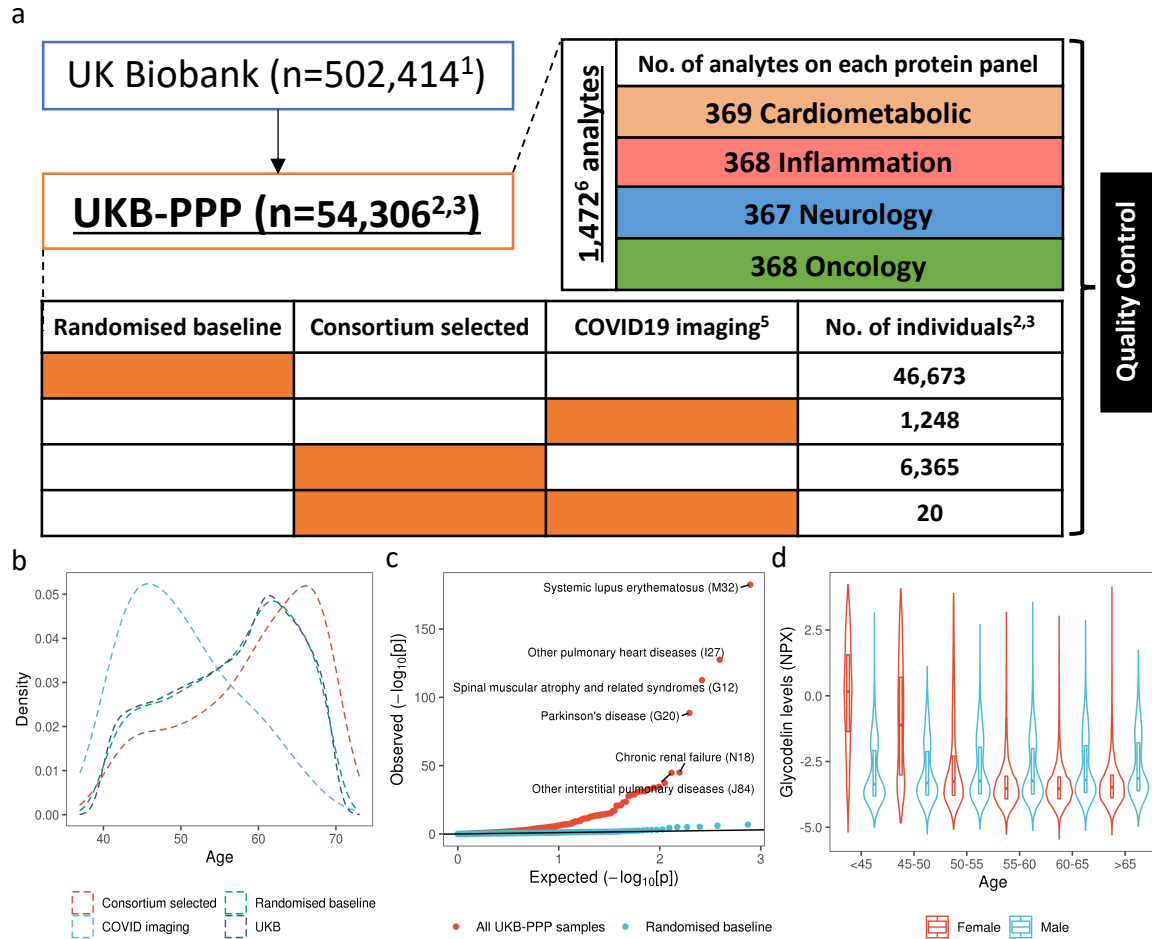

<sup>1</sup>Number based on Oct 2021 release of UK Biobank (UKB).

<sup>2</sup>Samples from individuals who have withdrawn from the study are excluded except in the sample processing schematic

<sup>3</sup>Samples (n=13) and plates (n=4) which were damaged/contaminated are not included in the summaries except in the sample processing schematic.

<sup>4</sup>Multiple measurements include a combination of blind duplicate samples (BSDs) and bridging samples.

<sup>5</sup>Participants selected for COVID19 positive status measured at baseline (n=1230), visit 2 (n=1209), and visit 3 (n=1,261). Visit 2 and 3 measurement were measured together in batch 7.

<sup>6</sup>1,463 unique proteins – 3 proteins were measured on all 4 protein panels. NT-proBNP and BNP, IL12A and IL12 are treated as separate proteins

UKB-PPP: UK Biobank Pharma Proteomics Project. NT: N-terminal. BNP: Brain natriuretic peptide. IL: Interleukin.

944  
 945  
 946



947 **Figure 2. Genetic architecture of pQTLs.** (a) Summary of pQTLs across the genome. Lower panel:  
 948 genomic locations of pQTLs against the locations of the gene encoding the protein target. *Cis* pQTLs  
 949 (red), *trans* (blue). Upper panel: number of associated protein targets for each genomic region (axis  
 950 capped at 100, regions with  $\geq 100$  number of associated proteins labelled, with number in parenthesis).  
 951 (b) Number of primary pQTLs per protein (top) and number of associated proteins per genomic region  
 952 (bottom). (c) Log absolute effect size against  $\log(\text{MAF})$  by *cis* and *trans* associations. (d) Distribution  
 953 of heritability and contributions from primary *cis* and *trans* pQTLs. (e-f) Number of primary  
 954 associations against sample size (e) and number of proteins assayed (f). (g) Mean proportion of variance  
 955 explained by primary pQTLs against sample size.

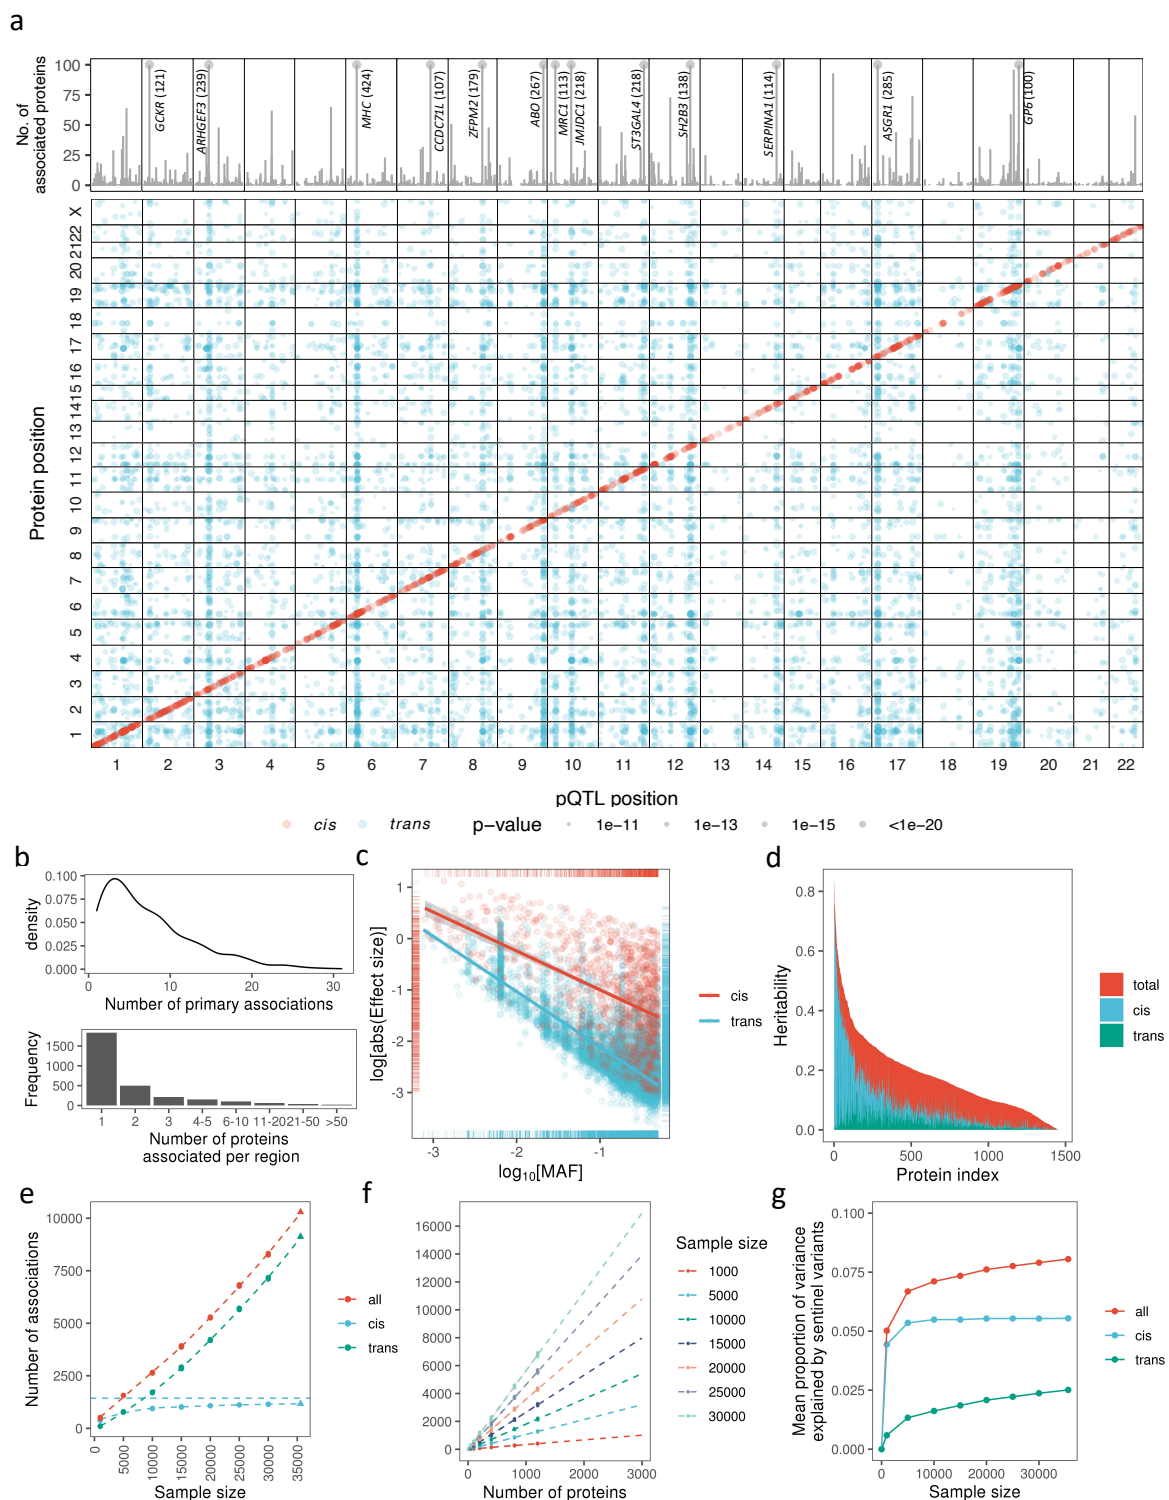

956

957 **Figure 3. Examples of pathway networks highlighted by *trans* pQTLs.**

958 (a) Schematic of how *trans* pQTLs function as part of the same protein-protein interaction or pathway  
 959 as the protein tested (protein X). Top left: proteins involved may be directly interacting or indirectly  
 960 involved as part of the same pathway. Bottom: *trans* pQTLs found for corresponding genes in *trans* (in  
 961 addition to potentially other signals and *cis* associations regulating protein X). Top right: some of the  
 962 mechanisms by which the *trans* pQTLs may regulate the target protein (protein X) including: (1)  
 963 regulating the levels of the binding partners (Y, Z) which in turn affects protein X levels, (2) altering  
 964 the interaction between Y/Z with X, (3) Modulating components of the pathway in which Y/Z may be  
 965 upstream/downstream of protein X. Figure created with BioRender.com including adaptations from  
 966 “The Principle of a Genome-wide Association Study” (b) IL15-sginalling pathway. Components with  
 967 \* and underline indicate genes with *trans* pQTLs for IL15 (primary association SNP in red). Figure  
 968 created with BioRender.com including adaptations from “Thrombopoietin Receptor Signaling”. (c)  
 969 Complement pathway. *Trans* pQTL and associated protein in red. Figure adapted from Giang et al,  
 970 Front Immunol (2018)<sup>90</sup>.  
 971

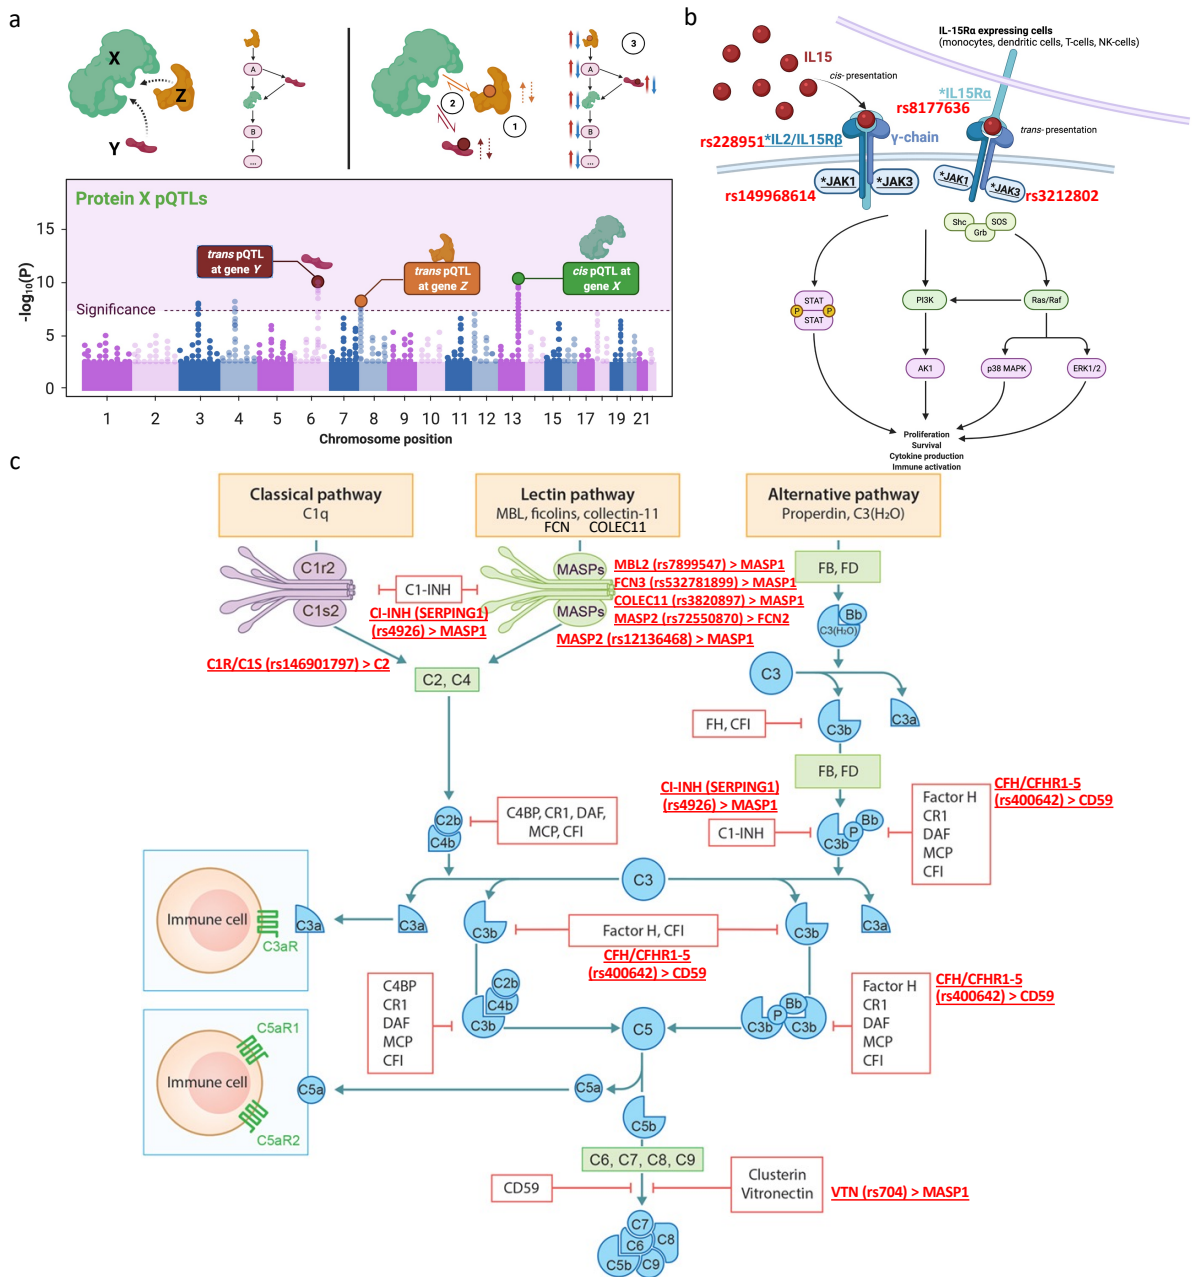

972  
973

974 **Figure 4. Regional association plots between COVID loci and pQTLs.** (a) Regional association  
 975 between COVID-19 locus at *MUC5B* and SFTPD, LAMP3, and MSLN *trans* pQTLs (b) Regional  
 976 association between COVID-19 locus at *TYK2* and colocalised *IL12RB1 trans* pQTL, in addition to the  
 977 *cis* pQTLs of ICAM-1,3,4 and 5 in close proximity.  
 978

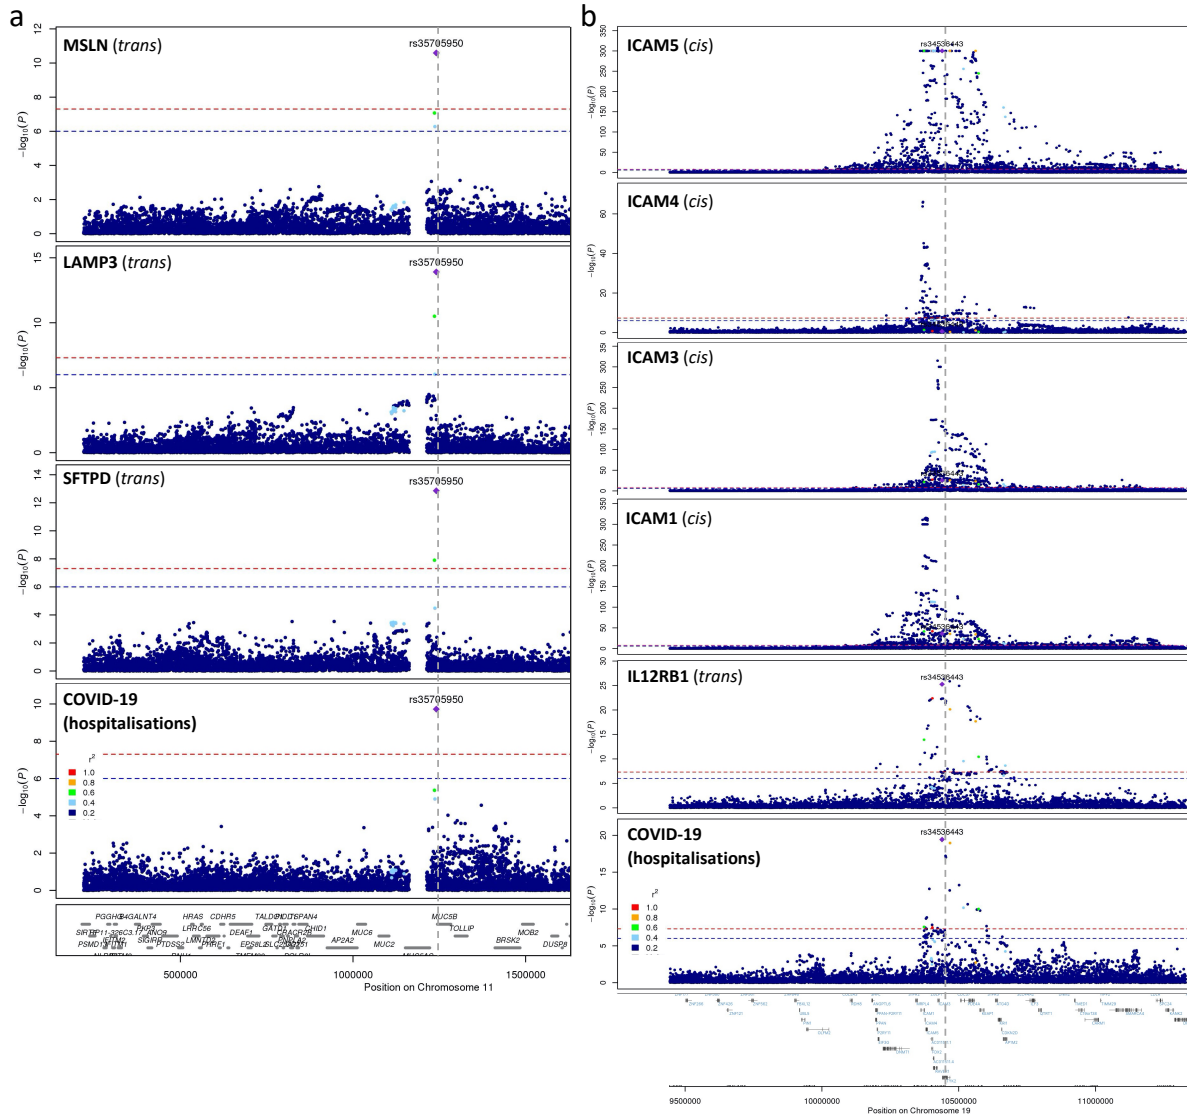

979  
 980

981 **Figure 5. ABO blood group FUT2 secretor status interaction.** (a) Boxplot of protein levels by blood  
 982 group and secretor status for four proteins with most significant interaction effects. Each box plot  
 983 presents the median, first and third quartiles, with upper and lower whiskers representing 1.5x inter-  
 984 quartile range above and below the third and first quartiles respectively. (b) Enrichment of genes  
 985 encoding proteins with significant interactions ( $p < 3.4 \times 10^{-5}$ ) for expression in various human (left) and  
 986 mouse (right) tissues. Numbers above bars represent  $p$ -values with blue bars representing significance  
 987 after multiple testing correction  
 988

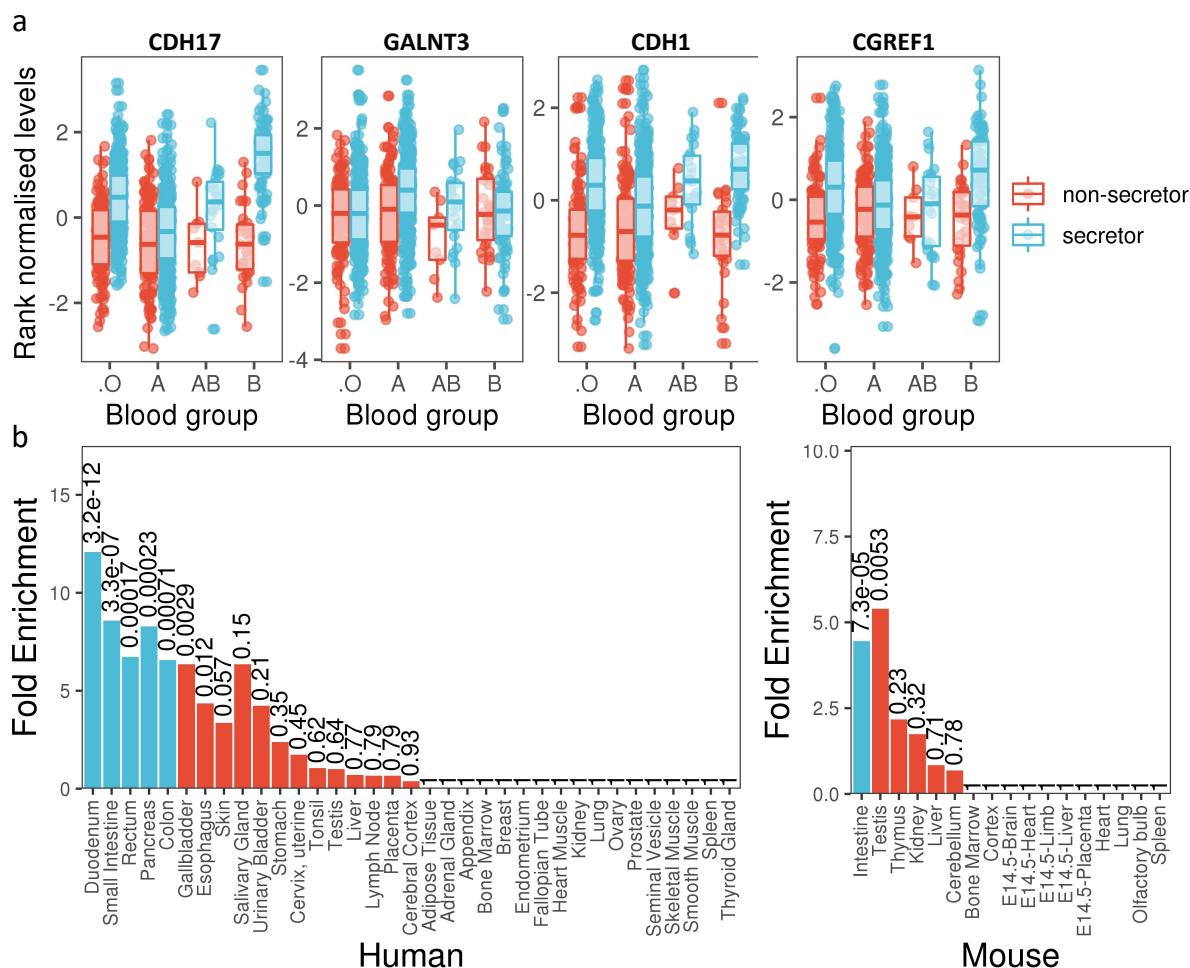

989  
 990  
 991

992 **References**

993 1 Finan, C. *et al.* The druggable genome and support for target identification and  
994 validation in drug development. *Sci Transl Med* **9**, doi:10.1126/scitranslmed.aag1166  
995 (2017).

996 2 Schmidt, A. F. *et al.* Genetic drug target validation using Mendelian randomisation.  
997 *Nat Commun* **11**, 3255, doi:10.1038/s41467-020-16969-0 (2020).

998 3 Nguyen, P. A., Born, D. A., Deaton, A. M., Nioi, P. & Ward, L. D. Phenotypes  
999 associated with genes encoding drug targets are predictive of clinical trial side effects.  
1000 *Nat Commun* **10**, 1579, doi:10.1038/s41467-019-09407-3 (2019).

1001 4 Christiansen, M. K. *et al.* Polygenic Risk Score-Enhanced Risk Stratification of  
1002 Coronary Artery Disease in Patients With Stable Chest Pain. *Circ Genom Precis Med*  
1003 **14**, e003298, doi:10.1161/CIRCGEN.120.003298 (2021).

1004 5 Reay, W. R. & Cairns, M. J. Advancing the use of genome-wide association studies  
1005 for drug repurposing. *Nat Rev Genet* **22**, 658-671, doi:10.1038/s41576-021-00387-z  
1006 (2021).

1007 6 Bycroft, C. *et al.* The UK Biobank resource with deep phenotyping and genomic data.  
1008 *Nature* **562**, 203-209, doi:10.1038/s41586-018-0579-z (2018).

1009 7 Canela-Xandri, O., Rawlik, K. & Tenesa, A. An atlas of genetic associations in UK  
1010 Biobank. *Nat Genet* **50**, 1593-1599, doi:10.1038/s41588-018-0248-z (2018).

1011 8 Littlejohns, T. J. *et al.* The UK Biobank imaging enhancement of 100,000  
1012 participants: rationale, data collection, management and future directions. *Nat*  
1013 *Commun* **11**, 2624, doi:10.1038/s41467-020-15948-9 (2020).

1014 9 Szustakowski, J. D. *et al.* Advancing human genetics research and drug discovery  
1015 through exome sequencing of the UK Biobank. *Nat Genet* **53**, 942-948,  
1016 doi:10.1038/s41588-021-00885-0 (2021).

1017 10 Julkunen, H., Cichonska, A., Slagboom, P. E., Wurtz, P. & Nightingale Health, U. K.  
1018 B. I. Metabolic biomarker profiling for identification of susceptibility to severe  
1019 pneumonia and COVID-19 in the general population. *Elife* **10**,  
1020 doi:10.7554/eLife.63033 (2021).

1021 11 Nelson, M. R. *et al.* The support of human genetic evidence for approved drug  
1022 indications. *Nat Genet* **47**, 856-860, doi:10.1038/ng.3314 (2015).

1023 12 King, E. A., Davis, J. W. & Degner, J. F. Are drug targets with genetic support twice  
1024 as likely to be approved? Revised estimates of the impact of genetic support for drug  
1025 mechanisms on the probability of drug approval. *PLoS Genet* **15**, e1008489,  
1026 doi:10.1371/journal.pgen.1008489 (2019).

1027 13 Gaziano, L. *et al.* Actionable druggable genome-wide Mendelian randomization  
1028 identifies repurposing opportunities for COVID-19. *Nat Med* **27**, 668-676,  
1029 doi:10.1038/s41591-021-01310-z (2021).

1030 14 Akbari, P. *et al.* Sequencing of 640,000 exomes identifies GPR75 variants associated  
1031 with protection from obesity. *Science* **373**, doi:10.1126/science.abf8683 (2021).

1032 15 Fauman, E. B. & Hyde, C. An optimal variant to gene distance window derived from  
1033 an empirical definition of cis and trans protein QTLs. *BMC Bioinformatics* **23**, 169,  
1034 doi:10.1186/s12859-022-04706-x (2022).

1035 16 Suhre, K., McCarthy, M. I. & Schwenk, J. M. Genetics meets proteomics:  
1036 perspectives for large population-based studies. *Nat Rev Genet* **22**, 19-37,  
1037 doi:10.1038/s41576-020-0268-2 (2021).

1038 17 Anderson, N. L. & Anderson, N. G. The human plasma proteome: history, character,  
1039 and diagnostic prospects. *Mol Cell Proteomics* **1**, 845-867, doi:10.1074/mcp.r200007-  
1040 mcp200 (2002).

1041 18 Enroth, S., Johansson, A., Enroth, S. B. & Gyllensten, U. Strong effects of genetic  
1042 and lifestyle factors on biomarker variation and use of personalized cutoffs. *Nat*  
1043 *Commun* **5**, 4684, doi:10.1038/ncomms5684 (2014).

1044 19 Karczewski, K. J. *et al.* The mutational constraint spectrum quantified from variation  
1045 in 141,456 humans. *Nature* **581**, 434-443, doi:10.1038/s41586-020-2308-7 (2020).

1046 20 Sun, B. B. *et al.* Genomic atlas of the human plasma proteome. *Nature* **558**, 73-79,  
1047 doi:10.1038/s41586-018-0175-2 (2018).

1048 21 Yao, C. *et al.* Genome-wide mapping of plasma protein QTLs identifies putatively  
1049 causal genes and pathways for cardiovascular disease. *Nat Commun* **9**, 3268,  
1050 doi:10.1038/s41467-018-05512-x (2018).

1051 22 Pietzner, M. *et al.* Mapping the proteo-genomic convergence of human diseases.  
1052 *Science* **374**, eabj1541, doi:10.1126/science.abj1541 (2021).

1053 23 Ferkingstad, E. *et al.* Large-scale integration of the plasma proteome with genetics  
1054 and disease. *Nat Genet* **53**, 1712-1721, doi:10.1038/s41588-021-00978-w (2021).

1055 24 Emilsson, V. *et al.* Co-regulatory networks of human serum proteins link genetics to  
1056 disease. *Science* **361**, 769-773, doi:10.1126/science.aaq1327 (2018).

1057 25 Folkersen, L. *et al.* Mapping of 79 loci for 83 plasma protein biomarkers in  
1058 cardiovascular disease. *PLoS Genet* **13**, e1006706, doi:10.1371/journal.pgen.1006706  
1059 (2017).

1060 26 Folkersen, L. *et al.* Genomic and drug target evaluation of 90 cardiovascular proteins  
1061 in 30,931 individuals. *Nat Metab* **2**, 1135-1148, doi:10.1038/s42255-020-00287-2  
1062 (2020).

1063 27 Conroy, M. *et al.* The advantages of UK Biobank's open-access strategy for health  
1064 research. *J Intern Med* **286**, 389-397, doi:10.1111/joim.12955 (2019).

1065 28 Douaud, G. *et al.* SARS-CoV-2 is associated with changes in brain structure in UK  
1066 Biobank. *Nature* **604**, 697-707, doi:10.1038/s41586-022-04569-5 (2022).

1067 29 Wik, L. *et al.* Proximity Extension Assay in Combination with Next-Generation  
1068 Sequencing for High-throughput Proteome-wide Analysis. *Mol Cell Proteomics* **20**,  
1069 100168, doi:10.1016/j.mcpro.2021.100168 (2021).

1070 30 Zhong, W. *et al.* Next generation plasma proteome profiling to monitor health and  
1071 disease. *Nat Commun* **12**, 2493, doi:10.1038/s41467-021-22767-z (2021).

1072 31 Zaghlool, S. B. *et al.* Revealing the role of the human blood plasma proteome in  
1073 obesity using genetic drivers. *Nat Commun* **12**, 1279, doi:10.1038/s41467-021-21542-  
1074 4 (2021).

1075 32 Tanaka, T. *et al.* Plasma proteomic biomarker signature of age predicts health and life  
1076 span. *Elife* **9**, doi:10.7554/eLife.61073 (2020).

1077 33 Ngo, D. *et al.* Aptamer-Based Proteomic Profiling Reveals Novel Candidate  
1078 Biomarkers and Pathways in Cardiovascular Disease. *Circulation* **134**, 270-285,  
1079 doi:10.1161/CIRCULATIONAHA.116.021803 (2016).

1080 34 Menni, C. *et al.* Circulating Proteomic Signatures of Chronological Age. *J Gerontol A*  
1081 *Biol Sci Med Sci* **70**, 809-816, doi:10.1093/gerona/glu121 (2015).

1082 35 Uchida, H. *et al.* Glycodelin in reproduction. *Reprod Med Biol* **12**, 79-84,  
1083 doi:10.1007/s12522-013-0144-2 (2013).

1084 36 Macdonald-Dunlop, E. *et al.* Mapping genetic determinants of 184 circulating  
1085 proteins in 26,494 individuals to connect proteins and diseases. *medRxiv*,  
1086 2021.2008.2003.21261494, doi:10.1101/2021.08.03.21261494 (2021).

- 1087 37 Asimit, J. L. *et al.* Stochastic search and joint fine-mapping increases accuracy and  
1088 identifies previously unreported associations in immune-mediated diseases. *Nat*  
1089 *Commun* **10**, 3216, doi:10.1038/s41467-019-11271-0 (2019).
- 1090 38 Benner, C. *et al.* FINEMAP: efficient variable selection using summary data from  
1091 genome-wide association studies. *Bioinformatics* **32**, 1493-1501,  
1092 doi:10.1093/bioinformatics/btw018 (2016).
- 1093 39 Wang, G., Sarkar, A., Carbonetto, P. & Stephens, M. A simple new approach to  
1094 variable selection in regression, with application to genetic fine mapping. *Journal of*  
1095 *the Royal Statistical Society: Series B (Statistical Methodology)* **82**, 1273-1300,  
1096 doi:<https://doi.org/10.1111/rssb.12388> (2020).
- 1097 40 Yang, J. *et al.* Conditional and joint multiple-SNP analysis of GWAS summary  
1098 statistics identifies additional variants influencing complex traits. *Nat Genet* **44**, 369-  
1099 375, S361-363, doi:10.1038/ng.2213 (2012).
- 1100 41 Alanis-Lobato, G., Andrade-Navarro, M. A. & Schaefer, M. H. HIPPIE v2.0:  
1101 enhancing meaningfulness and reliability of protein-protein interaction networks.  
1102 *Nucleic Acids Res* **45**, D408-D414, doi:10.1093/nar/gkw985 (2017).
- 1103 42 Kirk, J. A., Cheung, J. Y. & Feldman, A. M. Therapeutic targeting of BAG3:  
1104 considering its complexity in cancer and heart disease. *J Clin Invest* **131**,  
1105 doi:10.1172/JCI149415 (2021).
- 1106 43 Tadros, R. *et al.* Shared genetic pathways contribute to risk of hypertrophic and  
1107 dilated cardiomyopathies with opposite directions of effect. *Nat Genet* **53**, 128-134,  
1108 doi:10.1038/s41588-020-00762-2 (2021).
- 1109 44 Villard, E. *et al.* A genome-wide association study identifies two loci associated with  
1110 heart failure due to dilated cardiomyopathy. *Eur Heart J* **32**, 1065-1076,  
1111 doi:10.1093/eurheartj/ehr105 (2011).
- 1112 45 Cao, Z., Jia, Y. & Zhu, B. BNP and NT-proBNP as Diagnostic Biomarkers for  
1113 Cardiac Dysfunction in Both Clinical and Forensic Medicine. *Int J Mol Sci* **20**,  
1114 doi:10.3390/ijms20081820 (2019).
- 1115 46 Wang, Y. & Colonna, M. Interleukin-34, a cytokine crucial for the differentiation and  
1116 maintenance of tissue resident macrophages and Langerhans cells. *Eur J Immunol* **44**,  
1117 1575-1581, doi:10.1002/eji.201344365 (2014).
- 1118 47 Michalski, M. *et al.* Primary Ficolin-3 deficiency--Is it associated with increased  
1119 susceptibility to infections? *Immunobiology* **220**, 711-713,  
1120 doi:10.1016/j.imbio.2015.01.003 (2015).
- 1121 48 Michalski, M. *et al.* H-ficolin (ficolin-3) concentrations and FCN3 gene  
1122 polymorphism in neonates. *Immunobiology* **217**, 730-737,  
1123 doi:10.1016/j.imbio.2011.12.004 (2012).
- 1124 49 Schlapbach, L. J. *et al.* Congenital H-ficolin deficiency in premature infants with  
1125 severe necrotising enterocolitis. *Gut* **60**, 1438-1439, doi:10.1136/gut.2010.226027  
1126 (2011).
- 1127 50 Munthe-Fog, L. *et al.* Immunodeficiency associated with FCN3 mutation and ficolin-  
1128 3 deficiency. *N Engl J Med* **360**, 2637-2644, doi:10.1056/NEJMoa0900381 (2009).
- 1129 51 Sokolowska, A. *et al.* Mannan-binding lectin-associated serine protease-2 (MASP-2)  
1130 deficiency in two patients with pulmonary tuberculosis and one healthy control. *Cell*  
1131 *Mol Immunol* **12**, 119-121, doi:10.1038/cmi.2014.19 (2015).
- 1132 52 St Swierzko, A. *et al.* Mannan-binding lectin-associated serine protease-2 (MASP-2)  
1133 in a large cohort of neonates and its clinical associations. *Mol Immunol* **46**, 1696-  
1134 1701, doi:10.1016/j.molimm.2009.02.022 (2009).

- 1135 53 Stengaard-Pedersen, K. *et al.* Inherited deficiency of mannan-binding lectin-  
1136 associated serine protease 2. *N Engl J Med* **349**, 554-560,  
1137 doi:10.1056/NEJMoa022836 (2003).
- 1138 54 Vosa, U. *et al.* Large-scale cis- and trans-eQTL analyses identify thousands of genetic  
1139 loci and polygenic scores that regulate blood gene expression. *Nat Genet* **53**, 1300-  
1140 1310, doi:10.1038/s41588-021-00913-z (2021).
- 1141 55 Consortium, G. T. The GTEx Consortium atlas of genetic regulatory effects across  
1142 human tissues. *Science* **369**, 1318-1330, doi:10.1126/science.aaz1776 (2020).
- 1143 56 Foley, C. N. *et al.* A fast and efficient colocalization algorithm for identifying shared  
1144 genetic risk factors across multiple traits. *Nat Commun* **12**, 764, doi:10.1038/s41467-  
1145 020-20885-8 (2021).
- 1146 57 Buccitelli, C. & Selbach, M. mRNAs, proteins and the emerging principles of gene  
1147 expression control. *Nat Rev Genet* **21**, 630-644, doi:10.1038/s41576-020-0258-4  
1148 (2020).
- 1149 58 Obeidat, M. *et al.* Surfactant protein D is a causal risk factor for COPD: results of  
1150 Mendelian randomisation. *Eur Respir J* **50**, doi:10.1183/13993003.00657-2017  
1151 (2017).
- 1152 59 Palmos, A. B. *et al.* Proteome-wide Mendelian randomization identifies causal links  
1153 between blood proteins and severe COVID-19. *PLoS Genet* **18**, e1010042,  
1154 doi:10.1371/journal.pgen.1010042 (2022).
- 1155 60 Kelly, R. J., Rouquier, S., Giorgi, D., Lennon, G. G. & Lowe, J. B. Sequence and  
1156 expression of a candidate for the human Secretor blood group  
1157 alpha(1,2)fucosyltransferase gene (FUT2). Homozygosity for an enzyme-inactivating  
1158 nonsense mutation commonly correlates with the non-secretor phenotype. *J Biol*  
1159 *Chem* **270**, 4640-4649, doi:10.1074/jbc.270.9.4640 (1995).
- 1160 61 Chiou, J. *et al.* Interpreting type 1 diabetes risk with genetics and single-cell  
1161 epigenomics. *Nature* **594**, 398-402, doi:10.1038/s41586-021-03552-w (2021).
- 1162 62 Donertas, H. M., Fabian, D. K., Valenzuela, M. F., Partridge, L. & Thornton, J. M.  
1163 Common genetic associations between age-related diseases. *Nat Aging* **1**, 400-412,  
1164 doi:10.1038/s43587-021-00051-5 (2021).
- 1165 63 de Lange, K. M. *et al.* Genome-wide association study implicates immune activation  
1166 of multiple integrin genes in inflammatory bowel disease. *Nat Genet* **49**, 256-261,  
1167 doi:10.1038/ng.3760 (2017).
- 1168 64 Masuda, M., Okuda, K., Ikeda, D. D., Hishigaki, H. & Fujiwara, T. Interaction of  
1169 genetic markers associated with serum alkaline phosphatase levels in the Japanese  
1170 population. *Hum Genome Var* **2**, 15019, doi:10.1038/hgv.2015.19 (2015).
- 1171 65 Uhlen, M. *et al.* Proteomics. Tissue-based map of the human proteome. *Science* **347**,  
1172 1260419, doi:10.1126/science.1260419 (2015).
- 1173 66 Shen, Y. *et al.* A map of the cis-regulatory sequences in the mouse genome. *Nature*  
1174 **488**, 116-120, doi:10.1038/nature11243 (2012).
- 1175 67 Broz, P. & Dixit, V. M. Inflammasomes: mechanism of assembly, regulation and  
1176 signalling. *Nat Rev Immunol* **16**, 407-420, doi:10.1038/nri.2016.58 (2016).
- 1177 68 Lamkanfi, M. & Dixit, V. M. Mechanisms and functions of inflammasomes. *Cell* **157**,  
1178 1013-1022, doi:10.1016/j.cell.2014.04.007 (2014).
- 1179 69 Welzel, T. & Kuemmerle-Deschner, J. B. Diagnosis and Management of the  
1180 Cryopyrin-Associated Periodic Syndromes (CAPS): What Do We Know Today? *J*  
1181 *Clin Med* **10**, doi:10.3390/jcm10010128 (2021).
- 1182 70 Malcova, H. *et al.* IL-1 Inhibitors in the Treatment of Monogenic Periodic Fever  
1183 Syndromes: From the Past to the Future Perspectives. *Front Immunol* **11**, 619257,  
1184 doi:10.3389/fimmu.2020.619257 (2020).



1185 71 Giugliano, R. P. *et al.* Stroke Prevention With the PCSK9 (Proprotein Convertase  
1186 Subtilisin-Kexin Type 9) Inhibitor Evolocumab Added to Statin in High-Risk Patients  
1187 With Stable Atherosclerosis. *Stroke* **51**, 1546-1554,  
1188 doi:10.1161/STROKEAHA.119.027759 (2020).

1189 72 Karatasakis, A. *et al.* Effect of PCSK9 Inhibitors on Clinical Outcomes in Patients  
1190 With Hypercholesterolemia: A Meta-Analysis of 35 Randomized Controlled Trials. *J*  
1191 *Am Heart Assoc* **6**, doi:10.1161/JAHA.117.006910 (2017).

1192 73 Sabatine, M. S. *et al.* Efficacy and safety of evolocumab in reducing lipids and  
1193 cardiovascular events. *N Engl J Med* **372**, 1500-1509, doi:10.1056/NEJMoa1500858  
1194 (2015).

1195 74 Robinson, J. G. *et al.* Efficacy and safety of alirocumab in reducing lipids and  
1196 cardiovascular events. *N Engl J Med* **372**, 1489-1499, doi:10.1056/NEJMoa1501031  
1197 (2015).

1198 75 Pott, J. *et al.* Meta-GWAS of PCSK9 levels detects two novel loci at APOB and  
1199 TM6SF2. *Hum Mol Genet* **31**, 999-1011, doi:10.1093/hmg/ddab279 (2022).

1200 76 Zhang, J. *et al.* Plasma proteome analyses in individuals of European and African  
1201 ancestry identify cis-pQTLs and models for proteome-wide association studies. *Nat*  
1202 *Genet* **54**, 593-602, doi:10.1038/s41588-022-01051-w (2022).

1203 77 Sirugo, G., Williams, S. M. & Tishkoff, S. A. The Missing Diversity in Human  
1204 Genetic Studies. *Cell* **177**, 26-31, doi:10.1016/j.cell.2019.02.048 (2019).

1205 78 Kuhn, R. M., Haussler, D. & Kent, W. J. The UCSC genome browser and associated  
1206 tools. *Brief Bioinform* **14**, 144-161, doi:10.1093/bib/bbs038 (2013).

1207 79 Mbatchou, J. *et al.* Computationally efficient whole-genome regression for  
1208 quantitative and binary traits. *Nat Genet* **53**, 1097-1103, doi:10.1038/s41588-021-  
1209 00870-7 (2021).

1210 80 Chang, C. C. *et al.* Second-generation PLINK: rising to the challenge of larger and  
1211 richer datasets. *Gigascience* **4**, 7, doi:10.1186/s13742-015-0047-8 (2015).

1212 81 Bulik-Sullivan, B. K. *et al.* LD Score regression distinguishes confounding from  
1213 polygenicity in genome-wide association studies. *Nat Genet* **47**, 291-295,  
1214 doi:10.1038/ng.3211 (2015).

1215 82 Vuckovic, D. *et al.* The Polygenic and Monogenic Basis of Blood Traits and  
1216 Diseases. *Cell* **182**, 1214-1231 e1211, doi:10.1016/j.cell.2020.08.008 (2020).

1217 83 Hemani, G. *et al.* The MR-Base platform supports systematic causal inference across  
1218 the human phenome. *Elife* **7**, doi:10.7554/eLife.34408 (2018).

1219 84 Elsworth, B. *et al.* The MRC IEU OpenGWAS data infrastructure. *bioRxiv*,  
1220 2020.2008.2010.244293, doi:10.1101/2020.08.10.244293 (2020).

1221 85 Groot, H. E. *et al.* Genetically Determined ABO Blood Group and its Associations  
1222 With Health and Disease. *Arterioscler Thromb Vasc Biol* **40**, 830-838,  
1223 doi:10.1161/ATVBAHA.119.313658 (2020).

1224 86 Wolpin, B. M. *et al.* Pancreatic cancer risk and ABO blood group alleles: results from  
1225 the pancreatic cancer cohort consortium. *Cancer Res* **70**, 1015-1023,  
1226 doi:10.1158/0008-5472.CAN-09-2993 (2010).

1227 87 Pare, G. *et al.* Novel association of ABO histo-blood group antigen with soluble  
1228 ICAM-1: results of a genome-wide association study of 6,578 women. *PLoS Genet* **4**,  
1229 e1000118, doi:10.1371/journal.pgen.1000118 (2008).

1230 88 Melzer, D. *et al.* A genome-wide association study identifies protein quantitative trait  
1231 loci (pQTLs). *PLoS Genet* **4**, e1000072, doi:10.1371/journal.pgen.1000072 (2008).

1232 89 Jain, A. & Tuteja, G. TissueEnrich: Tissue-specific gene enrichment analysis.  
1233 *Bioinformatics* **35**, 1966-1967, doi:10.1093/bioinformatics/bty890 (2019).

1234 90 Giang, J. *et al.* Complement Activation in Inflammatory Skin Diseases. *Front*  
1235 *Immunol* **9**, 639, doi:10.3389/fimmu.2018.00639 (2018).  
1236
